# Supplementary material for: Axonal mechanisms mediating γ-aminobutyric acid receptor type A (GABA-A) inhibition of striatal dopamine release
Source: eLife. 2020 Sep 1;9:e55729. doi: 10.7554/eLife.55729 (PMC7462615; doi:10.7554/eLife.55729)
Supplement: Figure 1—source data 1. [file elife-55729-fig1-data1.xlsx]

## Sheet: Sheet1
Fig 1C	data are in Hz		Fig 1D	data are in ms			Fig 1E	Data are in mV			Fig 1G				Fig 1J	data are in GigaOhms			Fig 1K	data are in mV
axon	soma		axon	soma	power		axon	soma	power		X (length)	Y (slope)	power		Striatal Axon	Main Axon	power		Soma	Main Axon	Striatal Axon	power KW test total
2.9	5.6		0.736	1.903	0.629		-50.4	-38.2	0.99		293	19.8	0.99		3.28	0.935757	0.99		-59.2	-62.523	-63.8	0.87
4.77	3.3		0.985	1.04			-55.6	-38.8			307	23.32			5	0.788914			-60.9	-66.2	-72.7	power soma v. main axon
3.47	1.8		1.723	1.375			-61	-39.9			870.436	21.34			1.14	0.301421			-62.8	-75	-64.6	0.96
6.1	2.2		1.088	1.061			-45.2	-43.7			1301.53	10.7			2.33	0.307715			-62.7	-75	-63.9	power soma v. striatal axon
5.57	2.8		0.664	1.267			-46.4	-40.8			2253.89	4			0.9	0.874552			-59.6	-58.9	-63.8	0.98
5.6	2.9		0.9	1.258			-40.3	-42.6			926.9	3.24			0.37	0.448889			-60.5	-63.9	-57.1
2.12	2.7		0.504	1.122			-72.2	-43.4			2166.3	4.97			1.83	1.06718			-65.3	-60	-66
3.5	2.3		1.37	1.25			-57.2	-39.7			2022	11.2			1.57	1.036			-63	-62.8169	-74.4
3.07	1.6		1.2	1.237			-49.7	-45.1			1507	9.6			0.74	0.591621			-63.3	-65.538	-54
1.6	2.8		1.722	1.094			-50.3	-45.6			1288	9.15			1.16	0.961295			-64.6	-60.8766	-60.7
4.9			1.706				-43.8				713	4.4			1.21	2.48815				-66.6116	-75.6
4.7			1.324				-59.9				594.17	7.3			1.88	1.03814				-71.6824	-85.2
2.8			0.898				-57.4				581.9	9.75			1.02	1.36505				-76.8416	-76.4
3.3			0.819				-47.2				684	4.87			1.33	0.871262				-76.9648	-76.6
2.1			0.546				-76.2				1204	4.4			1.1	0.703433				-77.5176	-55.8
3.5			0.894				-61.6				287	13.2			0.86	0.481638				-70.8	-50.8
4.2			0.69				-68.1				486	17.6			0.88	0.606219				-67.5	-64.6
1.33			0.679				-63				0	92.9187			1.73	0.496343				-74.4	-77.7
3.2			0.586				-55.9				0	71.895			2.92	0.61541				-68.4428	-80
0.78			1.639				-60.2				0	25.245			3.55	0.628952				-74.2409	-97.9
1.6			1.058				-54.6				0	36.92			2.97	0.501307				-71.0239	-87.5
5			0.835				-61.8				0	64.3			2.29	0.465701					-73.9
5.2			0.792				-56.1				0	38.87			1.82	0.52704					-63.6
1.8			0.704				-60.5				0	58.37			0.35	0.558255					-64.5
2			0.942				-53.7				0	41.39			2.72	0.385408					-78.9
2.2			0.712				-55.5				0	26.589			0.69	0.451388					-67.1
2.6			0.626								0	70.31			1.92	0.491444					-76.5
3.3															1.39	0.361927					-71.9
1.7															0.43						-63.2
2															1.25						-67.5
2.2															1.83						-66.8
3.5															2.05						-70.3
3.7															3.06						-81.2
3.4															2.89						-81.6
3.1															1.24						-71
3.5															1.94						-85.4
0.8															1.66						-63.2
3.6															1.85						-68.6
2.2															1.98						-68.5
3.5															2.53						-71.1
3.3															1.38						-65.4
															2.22						-71
															1.66						-68.2
															1.18						-58.5
															2.47						-67.8
															2.91						-80.8
															2.45						-80.1
															2.31						-76.9
															4.15						-89.9687
															2.65						-81.1205
															1.26						-74.1696
															2.52						-79.1306
															1.15						-68.0878
															3.04						-71.6972
															0.76						-59.9801
															0.67						-66.6441
															3.13						-85.7628
															0.82						-60.5595
															1.08						-74.0309
															1.51						-75.3118
															0.7						-62.3557
															3.46						-87.786
															3.01						-74.5518
															2.42						-70.9459
															2.31						-86.1286
															1.95						-66.5182
															2.22						-59.999
															0.37						-65.5935
															1.42						-72.0558
															0.7						-61.2596
															1.26						-69.9241
															2.32						-75.7513
															2.02						-83.3534
															3.44						-78.8868
