# Supplementary material for: Axonal mechanisms mediating γ-aminobutyric acid receptor type A (GABA-A) inhibition of striatal dopamine release
Source: eLife. 2020 Sep 1;9:e55729. doi: 10.7554/eLife.55729 (PMC7462615; doi:10.7554/eLife.55729)
Supplement: Figure 2—source data 1. [file elife-55729-fig2-data1.xlsx]

## Sheet: Sheet1
Fig2C	data are in mV			Fig 2D	data are in mV			Fig2G	Data are in mV
Baseline	Picrotoxin	power		Low Chloride	High Chloride	power		Average Interspike Voltage	Muscimol Reversal	power
3.54019	1.09149	0.99		3.5239	7.13355	0.92		-62.523	-53.5	0.99
3.53976	1.08706			1.98269	14.2333			-66.2	-55.6
2.79234	0.268858			4.12533	17.5679			-75	-59.6
4.15155	-0.282			5.87539	18.7931			-75	-67.8
6.19435	0.483075			4.33023	7.60222			-58.9	-52.7
4.67709	-0.0046			3.82763				-63.9	-53.8
4.16424	0.899139			5.07795				-60	-42.5
5.31204	-0.376			9.27177				-62.8169	-54.9
9.38284	0.141235			6.5947				-65.538	-60.3
				2.76878				-60.8766	-42.6
								-66.6116	-46.1
								-71.6824	-67.9
								-76.8416	-53.3
								-76.9648	-75.6
								-77.5176	-58.3
