# Supplementary material for: Axonal mechanisms mediating γ-aminobutyric acid receptor type A (GABA-A) inhibition of striatal dopamine release
Source: eLife. 2020 Sep 1;9:e55729. doi: 10.7554/eLife.55729 (PMC7462615; doi:10.7554/eLife.55729)
Supplement: Figure 3—source data 1. [file elife-55729-fig3-data1.xlsx]

## Sheet: Sheet1
Fig 3C	data are normalized to the 10 minutes of baseline									Fig3F	data are normalized to NoPuff1							Supplement to Figure 3	data are normalized to the average of 10 minutes of baseline
slice1	slice2	slice3	slice4	slice5	slice6	slice7	slice8	slice9		NoPuff1	NoPuff2	NoPuff3	Puff1	Puff2	Puff3	power		slice1	slice2	slice3	slice4	slice5	slice6	slice7	slice8
0.975106	1.00106	0.957521	0.94245	0.885948	0.984051	1.39175	1.01373	1.03226		1	0.966514	0.858402	0.806013	0.726167	0.712293	0.99		1.00983	1.01011	0.994099	0.997433	1.0579	1.0083	1.01376	1.02485
1.02606	0.996828	1.03315	0.940323	0.950504	1.02283	1.09571	1.02586	1.07387		1	1.02817	0.942074	0.65628	0.746627	0.766195			1.00786	0.996675	0.993007	0.993622	1.0313	1.00303	1.01157	1.01178
0.963714	0.995056	0.978677	1.07451	1.08938	1.07417	0.780783	0.991723	0.928731		1	0.894638	0.868531	0.646413	0.551857	0.433392			1.00351	0.978598	0.998127	1.01181	1.0073	1.01458	1.01218	1.01013
0.981403	0.98629	1.01877	1.02939	0.864195	1.01793	0.817504	0.994072	0.943649		1	0.869693	0.823164	0.71776	0.669042	0.651464			0.990278	1.00699	1.00623	1.00373	0.979993	1.01659	0.997215	0.998873
1.05371	1.02077	1.01188	1.01332	1.20997	0.901012	0.914262	0.974621	1.0215		1	0.977266	0.932514	0.872486	0.812172	0.8182			0.995713	1.00335	1.00345	0.996824	0.967584	0.962924	0.986325	0.980964
0.923578	0.846799	0.927382	0.977522	1.11545	0.840028	0.479707	1.06057	0.974145		1	0.89107	0.936263	0.841326	0.908071	0.827641			0.992811	1.00428	1.00509	0.996585	0.95592	0.994588	0.978948	0.973403
0.810056	0.821847	0.903344	0.845509	1.29405	0.758882	0.950002	0.931742	0.948689		1	0.985659	0.910197	0.890618	0.910647	0.91982			0.973975	0.999004	1.01081	0.997715	0.921298	0.991021	0.971169	0.971803
0.827462	0.847547	0.892271	0.756954	1.02731	0.492386	0.308156	0.788258	0.90716										0.972598	0.987242	0.996452	0.992294	0.898677	0.98269	0.961827	0.957202
0.951752	0.855852	0.839993	0.730235	1.17981	0.304249	0.402785	0.86381	0.965693										0.956391	0.987025	0.999515	0.990311	0.878554	0.953657	0.944709	0.739543
0.810107	0.778543	0.758418	0.853828	0.727284	0.454026	0.322528	1.03058	0.732421										0.951517	1.00087	1.00819	0.971406	0.883744	0.955798	0.934016	0.963303
0.781108	0.833799	0.648414	0.807679	0.615627	0.321666	0.0491312	0.8285	0.653731										0.925143	0.995261	1.01176	0.961723	0.853342	0.962767	0.916245	0.94912
0.705057	0.736386	0.574316	0.823718	0.534551	0.133061	0.0466153	0.892971	0.672847										0.908062	1.01434	1.01795	0.956	0.828332	0.928606	0.90185	0.942797
0.688022	0.772433	0.712531	0.834659	0.644484	0.243434	0.565142	0.87942	0.606645										0.901967	1.03563	1.01955	0.956314	0.75302	0.903922	0.888519	0.95041
0.576748	0.737811	0.707249	0.724446	0.619201	0.237151	0.758862	0.839332	0.641448										0.891311	1.03144	1.02034	0.940843	0.737536	0.876363	0.874884	0.929675
0.634481	0.69899	0.584315	0.616101	0.720403	0.0573491	0.576787	0.849666	0.572883										0.884954	1.02139	1.00405	0.945348	0.766932	0.866899	0.874972	0.938369
0.757217	0.810491	0.795823	0.51742	0.640235	0.265623	0.314289	0.900257	0.591877										0.874757	1.03046	1.0111	0.902348	0.740594	0.823621	0.863701	0.931526
0.861308	0.807551	0.916014	0.588632	0.776485	0.412367	0.91299	0.898655	0.680484										0.884222	1.0328	1.01795	0.885645	0.720802	0.767271	0.859679	0.919618
0.889172	0.80199	0.932114	0.522153	0.942781	0.228039	0.782262	0.929191	0.679617										0.877474	1.0605	1.02917	0.872242	0.666215	0.745268	0.852837	0.909333
0.885833	0.712678	0.922273	0.479617	0.883887	0.133118	0.431443	1.08128	0.652712										0.886187	1.04792	1.04269	0.867531	0.636813	0.746881	0.854297	0.902874
0.96479	0.683425	0.893393	0.562201	0.918865	-0.0281481	0.428872	0.830791	0.759998										0.874903	1.04742	1.06156	0.856869	0.609572	0.743435	0.852162	0.885258
0.928732	0.696539	0.844776	0.757674	0.938548	0.24853	0.653957	0.877758	0.713991										0.885559	1.03562	1.07539	0.854149	0.598622	0.802526	0.852825	0.858747
0.888252	0.704534	0.855257	0.859147	0.933823	0.36499	0.577025	0.749634	0.580571										0.883045	1.03479	1.0596	0.859711	0.753956	0.78393	0.847371	0.865827
0.951896	0.668577	0.839182	0.848073	1.0786	0.286823	0.322886	0.730799	0.831502										0.889176	1.04193	1.06037	0.866129	0.73643	0.765911	0.844444	0.674133
0.90497	0.66027	0.785074	0.829935	1.17451	0.042693	0.393447	0.748071	0.78331										0.902142	1.05963	1.03557	0.871734	0.73956	0.760853	0.842455	0.730655
0.870326	0.603844	0.747494	0.82648	1.01801		0.381936	1.04076	0.793364										0.892928	1.0635	1.02031	0.872034	0.739167	0.766415	0.842056	0.839016
				1.06241			0.746677	0.722273										0.892757	1.08188	1.00658	0.835735	0.73077	0.727945	0.846106	0.821593
								0.781408
