# Supplementary material for: Axonal mechanisms mediating γ-aminobutyric acid receptor type A (GABA-A) inhibition of striatal dopamine release
Source: eLife. 2020 Sep 1;9:e55729. doi: 10.7554/eLife.55729 (PMC7462615; doi:10.7554/eLife.55729)
Supplement: Figure 4—source data 1. [file elife-55729-fig4-data1.xlsx]

## Sheet: Sheet1
Fig4D	Reduction in AP Peak (mV)				Fig4E	Slowing of AP rate of rise			Fig4F	slowing of rate of rise vs. shortening of AP				Fig4H	Data are plotting change in AP Peak, baseline subtracted to the average of 100 APs before TTX effect onset							Fig4I	each data point is from a single action potential
Increase in Baseline Voltage	from GABA	from direct depolarization	power		Increase in Baseline Voltage	from GABA	from direct depolarization		Slowing in rate of AP rise	Shortening of AP from GABA	Shortening of AP from direct depolarization	power		Axon1	Axon2	Axon3	Axon4	Axon5				Slowing of AP rate of rise	Shortening of AP from TTX	Slowing of AP rate of rise	Shortening of AP from TTX	Slowing of AP rate of rise	Shortening of AP from TTX	Slowing of AP rate of rise	Shortening of AP from TTX	Slowing of AP rate of rise	Shortening of AP from TTX
10.9		-9.8	0.93						-39.697	-15.2		0.99		0.988044	-0.456555	-0.531489	6.51142	0.524842	spike1			axon1		axon2		axon3		axon4		axon5
16.6		-8			6.91416	-39.697			-16.528	-5.7				0.713386	-0.578625	0.261968	5.22969	-0.512756	spike2			1.04692	0.570786	1.66543	0.815913	3.30182	0.0760662	2.07101	0.00636889	-0.64048	0.877297
7.8		-3.9			2.63378	-16.528			-13.8126	-5.75				0.316658	-0.731213	-0.531489	8.46455	-1.03155	spike3			-2.91571	1.36424	-0.69889	0.327632	3.30182	-0.35118	-10.4043	-1.6721	1.02477	0.511086
29.3		-13.6			1.74	-13.8126			-14.8857	-6.09				0.40821	-0.487073	-0.226314	5.41279	0.433289	spike4			-3.57615	0.204575	-8.57993	-0.832036	9.14909	-0.198592	-7.00197	-0.176737	-6.19129	0.480568
32.9		-28.9			2.98	-14.8857			-15.587	-5.7				-0.0800709	-0.578625	-0.531489	7.3354	-2.16071	spike5			-6.2179	-0.436294	-5.42751	-1.65601	4.27636	-1.0836	-7.90927	-0.359842	-1.19556	0.572121
46.5		-28.8			4.04	-15.587			-19.5639	-7.9				0.621833	-1.55519	-0.134761	3.49018	-1.91656	spike6			-5.55746	0.479233	-7.00372	-1.10669	2.32727	-1.29722	-3.82643	-0.817606	2.13493	0.0533219
8.1		-7.85			6.96	-19.5639			-25.3701	-11.5				-0.141106	-2.1045	-0.104243	2.8188	-0.970519	spike7			-2.91571	1.05907	3.24164	1.45678	-0.59636	-1.17515	-1.78501	-0.665018	-3.41588	0.938332
13.9		-8.5			6.02287	-25.3701			-13.0586	-5.1				0.28614	-0.944836	0.261968	7.03022	0.280701	spike8			-6.2179	0.570786	0.483271	0.327632	3.30182	-1.29722	-8.58974	-0.909158	-5.08113	-0.099266
5.8		-2.57			4.09744	-13.0586			-12.5773	-5.4				-0.141106	-1.64674	-0.745112	3.49018	-0.238098	spike9			-6.87833	1.02855	0.877323	0.48022	-2.54545	-1.57188	-2.23866	0.769308	-8.41161	0.877297
15.2		-9.31			3.09	-12.5773			-30.4504	-21.2				0.28614	-1.09742	-0.500972	6.05366	0.128113	spike10			-8.85964	0.26561	-4.63941	-0.282719	-5.46909	-0.656356	-4.28008	-0.970194	-2.30572	-0.312889
23.5		-14.6			7.05	-30.4504			-27.5074	-8.7				0.133552	0.306384	-0.378901	4.25312	-0.299133	spike11			-4.89702	2.12718	-0.69889	0.266597	-8.39273	-0.869979	-5.18738	-0.695535	-11.187	-0.0382308
29.37		-20.7			4.7165	-27.5074			-51.5574		-9.31			-0.324212	-1.03639	-0.0432081	5.16865	-0.360168	spike12			-6.2179	3.16478	-2.27509	-0.099614	-7.41818	-1.6024	3.8856	0.25051	-7.30145	0.419533
11.1		-9.97			13.57	-52.9			-16.199		-2.57			-0.0495533	-0.731213	-0.165278	4.13105	1.37933	spike13			-6.2179	1.54735	1.27138	-0.221684	-12.2909	-0.992049	-2.23866	0.433615	-10.6319	0.144875
32.6		-33.5			6.61	-49.1			-31.0258		-9.97			0.743904	-1.61622	-1.20288	4.19209	-0.116027	spike14			-10.1805	1.24217	-1.88104	-0.893071	-5.46909	-1.75499	-13.5799	-1.21433	-15.0726	-0.00771323
50.2		-41.1			15.646		-51.5574		-27.0268		-3.9			0.774421	-1.25001	-0.195796	4.43623	-0.695861	spike15			-11.5014	0.387681	-9.36803	-2.96827	-6.44364	-2.15172	-6.54832	-0.6345	-11.187	-0.434959
6.4	-15.2				5.92668		-16.199		-38.7224		-8			-0.232659	-0.731213	-0.348384	2.05586	-1.36725	spike16			-10.841	1.21166	-4.63941	-2.57154	-7.41818	-2.45689	-9.72387	-2.00779	-6.74637	-0.00771323
2.6	-5.7				10.8402		-31.0258		-55.8411		-9.8			-0.171624	-0.27345	0.475591	1.23188	-1.9776	spike17			-10.841	0.296128	-8.97398	-2.02222	-15.2145	-1.99913	-19.4773	-1.91624	-6.19129	-0.404442
6.5	-17.8				7.42861		-27.0268		-40.7081		-7.85			0.0419994	-0.456555	-0.104243	4.34468	0.616395	spike18			-5.55746	1.30321	-10.9442	-4.40259	-15.2145	-2.8231	-19.4773	-2.80125	-12.2972	0.0228043
3.9	-5.7				10.5162		-38.7224		-52.4349		-8.5			0.0419994	1.52709	-1.17236	4.07002	1.13519	spike19			-6.2179	2.49339	-16.0669	-5.04346	-14.24	-3.06724	-9.27022	-2.95384	-14.5175	-0.00771323
6.2	-16.3				17.1207		-55.8411							-0.781975	-0.609143	0.689214	3.85639	1.04364	spike20			-10.1805	1.18114	1.27138	0.571773	-18.1382	-2.45689	-17.4359	-4.66282	-20.0683	-1.53359
5.8	-7.9				8.64994		-40.7081							-0.324212	-0.944836	-0.745112	3.36811	-0.390685	spike21			-5.55746	1.30321	6.7881	2.83007	-16.1891	-3.46397	-12.2189	-3.50315	-16.1827	0.389015
6.6	-11.5				13.9956		-52.4349							0.0114819	-0.303967	-0.65356	2.20845	-0.726379	spike22			-9.52008	0.0825048	-10.9442	-3.09034	-15.2145	-3.76915	-16.075	-3.10642	-16.7378	0.358498
3.5	-5.1													-0.72094	-0.822766	-0.287349	1.38447	1.25726	spike23			-9.52008	0.845444	-1.48699	-2.57154	-18.1382	-3.18931	-19.7041	-4.20506	-23.3988	-0.953758
3.09	-5.4													0.255622	-0.27345	0.139897	1.93379	0.494324	spike24			-12.1618	0.204575	-8.57993	-2.99878	-24.96	-4.16588	-14.4872	-2.98435	-15.6277	-2.14394
13.57	-21.2													-0.781975	-0.548108	0.170415	4.49726	0.0975958	spike25			-12.8223	-0.344741	0.089219	-1.01514	-24.96	-3.79967	-25.1479	-3.83885	-19.5132	-1.16738
3.7	-8.7													0.133552	-0.151379	-0.348384	3.36811	-0.116027	spike26			-13.4827	-0.86354	-16.461	-5.44019	-30.8073	-4.19639	-22.426	-3.71678	-20.6234	-1.44204
0.66	-6.2													-0.629387	1.40502	0.536626	3.5207	1.89813	spike27			-16.1245	-0.405776	-7.39777	-3.18189	-32.7564	-5.02037	-24.0138	-3.96092	-23.9539	-1.50307
1.74	-5.75													0.133552	-0.365002	0.872319	2.75776	-1.03155	spike28			-17.4453	-0.924575	-15.6729	-6.23365	-32.7564	-6.05797	-24.4675	-4.57127	-21.1785	-1.35049
2.98	-6.09													0.377693	1.34398	0.780767	3.30708	0.616395	spike29			-18.7662	-1.04665	-16.461	-5.13501	-31.7818	-5.6002	-26.5089	-3.9304	-23.9539	-2.66274
														-1.54491	-0.0903441	0.139897	2.94087	1.16571	spike30			-18.1058	0.0519872	-14.4907	-5.19605	-42.5018	-6.24107	-24.0138	-4.6323	-22.2886	-2.20498
														-0.171624	0.48949	0.0483447	2.8188	1.04364	spike31			-16.7849	-0.192153	-10.9442	-2.57154	-38.6036	-6.54625	-27.643	-3.89988	-25.6191	-2.63223
														-0.354729	-0.700696	-0.195796	2.14741	0.830018	spike32			-14.1431	-0.588882	-10.9442	-2.38843	-42.5018	-6.42418	-29.6844	-3.89988	-23.9539	-2.9374
														-0.781975	-0.944836	-0.195796	0.0722149	0.830018	spike33			-18.7662	-1.16872	-16.855	-6.14209	-45.4255	-7.1566	-26.0552	-4.4492	-25.6191	-2.20498
														-0.293694	-0.883801	-0.348384	0.468943	2.84418	spike34			-20.0871	-0.6194	-17.6431	-5.77588	-47.3745	-6.69884	-27.4162	-4.38816	-26.1742	-3.48672
														-0.690422	-0.303967	0.0788623	1.01826	0.707947	spike35			-21.408	-1.38234	-10.1561	-3.45655	-49.3236	-8.22472	-29.4576	-5.1511	-26.1742	-3.91396
														-0.476799	-0.609143	-0.0737256	-1.36211	0.00604308	spike36			-22.7288	-1.16872	-17.6431	-5.31812	-53.2218	-9.29283	-25.6016	-5.51731	-31.725	-3.94448
														-0.415764	-1.28053	0.0483447	-2.00298	2.84418	spike37			-16.1245	-3.67116	-10.5502	-4.0669	-57.12	-9.62852	-27.1893	-4.60179	-28.3945	-3.4562
														0.133552	0.0317262	0.719731	3.61225	0.952088	spike38			-22.7288	-3.03029	-10.9442	-3.24292	-58.0945	-9.62852	-31.499	-4.69334	-28.3945	-3.91396
														-0.324212	-0.548108	0.35352	5.87055	0.646912	spike39			-19.4266	-1.8401	-16.461	-4.43311	-64.9164	-10.2999	-30.8185	-4.78489	-32.2801	-4.06655
														0.16407	-0.334485	0.261968	-0.0498555	-0.299133	spike40			-24.0497	-1.657	-10.9442	-4.28052			-29.6844	-5.21214	-31.725	-4.12759
														0.225105	0.764148	0.23145	0.468943	0.0670782	spike41			-23.3893	-1.59596	-18.4312	-6.29468			-29.9112	-5.18162	-30.6149	-4.28017
														-0.751458	-0.212414	-0.378901	0.0416973	0.646912	spike42			-22.7288	-1.77907	-20.0074	-6.96607			-29.4576	-5.02903	-26.7293	-5.13467
														-0.476799	0.794666	-0.439937	2.02534	-1.12311	spike43			-25.3706	-1.26027	-17.2491	-5.50123			-28.3235	-4.66282	-28.9496	-4.86001
														-0.537835	2.16796	-0.989253	-2.39971	-1.18414	spike44			-28.6728	-2.51149	-13.7026	-4.49415			-34.2209	-5.27317	-28.3945	-6.35537
														-0.751458	0.336902	0.323003	-0.141408	0.280701	spike45			-26.6915	-2.57252	-17.6431	-6.41675			-35.5819	-5.85301	-28.9496	-6.44692
														-0.354729	0.672595	-1.23339	-3.19317	0.830018	spike46			-26.6915	-2.51149	-18.4312	-7.66797			-36.716	-5.88352	-31.725	-6.66055
														0.16407	-0.120862	-1.08081	-2.09453	0.860535	spike47			-24.7101	-1.53493	-21.1896	-7.27125			-34.9014	-6.28025	-31.1699	-6.72158
														-0.0800709	0.48949	-0.531489	-2.15557	-0.512756	spike48			-28.0123	-2.11476	-12.9145	-3.67017			-30.8185	-6.03611	-32.8352	-6.47744
														-0.568352	-0.39552	-0.928218	0.468943	0.00604308	spike49			-33.9563	-2.96925	-20.0074	-7.24073			-37.3964	-6.1887	-36.7208	-7.54556
														-0.415764	0.0927614	-1.20288	0.652049	0.311219	spike50			-31.3145	-2.66408	-19.6134	-6.17261			-32.6331	-5.4868	-36.7208	-7.17934
														-0.385247	0.00120862	-0.317866	-3.10161	-0.848449	spike51			-33.9563	-4.89186	-20.0074	-7.3628			-34.6746	-5.39524	-36.7208	-7.02676
														-0.171624	-0.761731	-0.65356	-2.7354	-0.299133	spike52			-34.6167	-3.36598	-9.36803	-2.96827			-33.0868	-5.30369	-37.2758	-7.75918
														-0.110588	-0.0598265	-0.439937	-0.416066	-0.940002	spike53			-31.975	-2.90822	-16.855	-6.17261			-34.6746	-5.4868	-43.3817	-8.67471
														-0.171624	0.0927614	-0.409419	-2.27764	-0.146545	spike54			-33.9563	-3.21339	-15.2788	-5.89795			-35.5819	-5.1511	-40.0512	-8.58315
														-0.385247	-0.365002	0.35352	-1.02642	-0.482238	spike55			-36.598	-3.64064	-19.2193	-6.99659			-36.0355	-5.54783	-39.4962	-9.74282
														0.316658	0.581043	0.0483447	-0.202443	0.00604308	spike56			-33.2958	-2.63356	-14.0967	-6.53882			-35.8087	-6.09715	-42.2716	-8.94936
														0.133552	0.123279	0.10938	-1.39263	-0.787414	spike57			-35.9376	-3.09132	-20.7955	-7.60694			-35.355	-5.57835	-43.3817	-8.67471
														0.682869	0.458972	-0.439937	-1.24004	-0.482238	spike58			-35.2771	-4.15944	-18.8253	-7.79004			-34.9014	-5.4868	-45.047	-8.94936
														0.499763	-0.242932	-0.439937	-3.2542	0.463807	spike59			-39.2398	-5.01393	-16.461	-7.14917			-35.355	-5.36472	-44.4919	-8.61367
														-0.110588	0.916736	-0.134761	-3.92559	0.646912	spike60			-40.5606	-3.85426	-20.0074	-7.30176			-37.6233	-6.37181	-47.2673	-9.55972
														0.377693	0.245349	-0.104243	-2.46074	0.67743	spike61			-40.5606	-5.01393	-20.7955	-7.24073			-38.9842	-6.76853	-46.7122	-10.6889
														0.469246	0.184314	0.139897	-1.45366	-1.51984	spike62			-43.2024	-5.01393	-18.4312	-6.05054			-34.6746	-5.88352	-50.0427	-9.74282
														-0.72094	0.00120862	0.689214	-3.37627	0.250184	spike63			-43.8628	-4.6172	-18.4312	-7.57642			-43.9744	-7.13474	-48.9325	-9.80386
														0.621833	-0.181897	-0.195796	-4.62749	0.646912	spike64			-42.542	-4.55617	-20.4015	-8.49195			-42.8402	-6.1887	-47.2673	-9.80386
														-0.110588	-0.27345	0.658696	-4.23076	1.04364	spike65			-41.8815	-4.55617	-18.0372	-7.42383			-38.5306	-7.31785	-51.1529	-9.83437
														-0.354729	0.36742	0.689214	-0.629689	0.0975958	spike66			-45.1837	-5.10548	-15.6729	-6.26416			-39.211	-6.43284	-49.4876	-10.048
														0.28614	-0.365002	0.689214	-4.20025	-0.299133	spike67			-45.1837	-4.73927	-20.7955	-6.72193			-36.4892	-5.76145	-48.3775	-10.8109
														0.16407	0.36742	0.506108	-3.13213	0.372254	spike68			-43.2024	-5.04445	-12.5204	-4.89087			-40.572	-7.80613	-51.1529	-11.3603
														0.316658	-0.029309	0.719731	-4.32232	0.67743	spike69			-44.5233	-5.136	-18.0372	-6.26416			-44.2012	-6.7075	-52.263	-11.4518
														0.316658	-0.029309	0.597661	0.0722149	2.47797	spike70			-46.5046	-5.10548	-16.855	-5.34864			-42.3866	-8.38597	-53.3732	-10.2311
														0.16407	0.794666	0.719731	-3.13213	-0.299133	spike71			-45.1837	-4.98341	-10.5502	-2.63257			-46.0158	-6.73802	-53.9283	-10.7804
														-0.110588	0.00120862	0.872319	-2.85747	-1.12311	spike72			-48.4859	-5.53273	-12.9145	-4.5857			-45.3353	-7.9282	-53.3732	-10.6889
														0.499763	-0.0903441	0.811284	-3.95611	-1.2757	spike73			-49.8068	-4.98341	-13.3086	-4.09742			-45.1085	-7.07371	-52.8181	-11.6654
														0.40821	-0.151379	0.35352	-3.49834	-1.76398	spike74			-45.1837	-5.10548	-12.5204	-4.5857			-45.789	-7.56199	-52.263	-11.9401
														-0.110588	1.40502	0.628179	-4.56646	0.0365607	spike75			-48.4859	-5.92946	-10.5502	-3.09034			-40.572	-6.76853	-57.8138	-12.3673
														0.499763	0.61156	1.63526	-4.74956	1.16571	spike76			-47.8254	-6.38722	-14.8848	-4.28052			-45.1085	-7.95872	-53.9283	-12.0011
														0.988044	0.855701	0.658696	-4.10869	2.93573	spike77			-49.1463	-6.02101	-10.1561	-3.24292			-44.428	-7.62303	-58.924	-12.2453
														-0.202141	0.0622438	0.597661	-4.26128	2.17279	spike78			-49.1463	-6.23463	-13.3086	-3.82276			-45.3353	-7.50096	-57.2588	-12.7641
														0.40821	0.520007	-0.409419	-4.20025	1.95917	spike79			-47.8254	-5.89894	-14.8848	-5.47071			-47.1499	-7.80613	-62.2545	-12.9166
														0.988044	1.19139	0.597661	-3.01006	0.646912	spike80			-49.1463	-5.34962	-11.7323	-4.34156			-46.6963	-7.86717	-59.4791	-13.8017
														0.255622	-0.51759	0.323003	-4.53594	-0.146545	spike81			-47.8254	-5.6548	-10.9442	-4.73829			-45.3353	-6.43284	-60.5892	-13.7711
														-0.690422	0.0317262	-0.409419	-5.45147	-0.909484	spike82			-49.1463	-5.34962	-17.6431	-5.34864			-44.6548	-6.7075	-57.2588	-13.466
														0.438728	0.825183	0.628179	-4.38335	-1.24518	spike83			-47.8254	-5.6548	-7.00372	-3.48707			-43.9744	-7.31785	-63.9197	-12.6115
														0.530281	-0.334485	0.536626	-3.22368	-0.116027	spike84			-52.4485	-6.63136	-14.8848	-5.16553			-47.6036	-7.59251	-61.6994	-13.3439
														-0.0190357	-0.975354	0.139897	-3.68145	0.738465	spike85			-51.7881	-5.53273	-12.1264	-4.79932			-50.5523	-7.31785	-64.4748	-12.9166
														0.499763	-0.0598265	-0.287349	-1.85039	0.0670782	spike86			-54.4298	-7.30275	-12.9145	-4.67725			-47.1499	-7.68406	-60.5892	-13.527
														0.530281	0.520007	0.0788623	-3.22368	-1.21466	spike87			-54.4298	-7.18068	-19.6134	-5.77588			-46.9231	-6.8906	-62.8096	-14.1984
														0.652351	0.0317262	0.414556	-2.30816	-0.146545	spike88			-55.7507	-6.6924	-17.2491	-6.14209			-46.9231	-7.07371
														-0.0495533	0.48949	0.10938	0.407908	-1.58087	spike89			-56.4111	-7.42482	-21.1896	-6.96607			-47.1499	-7.37889
														-0.415764	-0.27345	0.0788623	-1.54522	-0.360168	spike90			-57.0716	-7.36378	-17.2491	-5.92847			-44.8817	-6.46336
														0.438728	1.58812	0.0483447	-1.05694	-2.03863	spike91			-55.7507	-6.90602	-15.2788	-5.56226			-46.0158	-7.34837
														0.438728	2.62572	-0.531489	-1.54522	-0.543273	spike92			-56.4111	-6.6924	-16.461	-5.16553			-48.5108	-7.56199
														-0.110588	1.00829	0.139897	-0.0498555	-0.726379	spike93			-57.732	-7.73	-17.6431	-5.07398			-50.7791	-8.23338
														-0.0190357	0.703113	0.445073	-1.24004	-1.18414	spike94			-59.0529	-7.24171	-16.461	-5.47071			-50.7791	-7.43992
														0.103035	-0.151379	0.35352	-0.202443	-1.03155	spike95			-57.732	-7.69948	-22.7658	-7.63746			-48.9645	-8.14182
														-0.263176	0.672595	0.23145	-0.782277	-1.2757	spike96			-53.7694	-7.18068	-21.9777	-6.69141			-50.0986	-7.89768
														-0.263176	-0.242932	-0.134761	-2.43023	0.402772	spike97			-59.0529	-7.63844	-22.7658	-6.08106			-51.4596	-7.7451
														0.194587	0.764148	-0.165278	-1.30108	-1.33673	spike98			-59.0529	-8.58449	-24.342	-8.24781			-50.5523	-7.95872
														-0.904046	1.95433	-0.0737256	-1.6978	-1.06207	spike99			-59.7133	-6.53981	-23.5539	-7.48487			-52.3669	-7.53147
														-0.354729	0.642078	-0.592524	-2.30816	-0.116027	spike100			-63.0155	-8.12672	-25.5242	-7.97315			-52.3669	-7.9282
														0.225105	0.764148	0.292485	-0.446584	0.0670782	spike101	TTX Effect Onset		-62.3551	-9.37794	-23.948	-6.844			-55.3156	-7.37889
														-0.568352	-0.456555	-0.745112	-2.12505	-1.58087	spike102			-58.3924	-7.88258	-21.9777	-6.08106			-51.6864	-7.25681
														-0.0800709	0.306384	0.23145	-1.75884	-1.00104	spike103			-63.6759	-9.19484	-27.1004	-8.27833			-51.0059	-8.20286
														-0.0190357	-0.334485	-0.958735	-1.63677	-2.37433	spike104			-62.3551	-8.73708	-28.2825	-9.1023			-56.4497	-8.87425
														-0.446282	-0.883801	-0.684077	-2.7354	-2.28278	spike105			-59.0529	-7.02809	-33.4052	-9.98731			-53.9546	-7.80613
														-0.293694	-1.4026	-0.226314	-3.10161	-3.16779	spike106			-60.3738	-7.97414	-30.2528	-9.68213			-53.7278	-7.56199
														-1.1787	-0.944836	-0.500972	-3.92559	-3.32037	spike107			-63.6759	-9.28639	-29.4647	-9.01075			-55.9961	-8.56907
														-1.39233	-1.46364	-0.65356	-2.88799	-5.02936	spike108			-63.0155	-8.64552	-27.4944	-7.97315			-56.4497	-8.72166
														-1.27026	-1.58571	-1.08081	-2.52178	-3.86969	spike109			-61.6946	-8.76759	-27.4944	-8.91919			-55.3156	-8.29441
														-1.39233	-0.487073	-0.65356	-2.12505	-3.47296	spike110			-63.0155	-9.43898	-28.2825	-7.17969			-55.5424	-8.99632
														-1.66698	-0.731213	-1.05029	-2.0335	-4.57159	spike111			-61.6946	-8.4319	-34.9814	-11.8184			-55.5424	-8.05027
														-0.751458	-1.12794	-0.623042	-2.43023	-3.35089	spike112			-63.6759	-9.10329	-36.5576	-11.3301			-59.8521	-8.59959
														-0.965081	-1.70778	-0.65356	-4.59697	-4.20538	spike113					-34.9814	-10.9028			-58.7179	-9.05735
														-1.6975	-1.15846	-2.17944	-3.65093	-4.08331	spike114					-37.7398	-12.0625			-55.7692	-7.86717
														-1.08715	-1.9214	-0.256831	-3.04058	-4.32745	spike115					-38.9219	-11.6963			-57.1302	-8.17234
														-1.85009	-1.70778	-0.287349	-5.20733	-4.9378	spike116					-38.1338	-11.8489			-53.0473	-8.17234
														-2.24682	-4.21022	-1.5996	-4.44439	-4.29694	spike117					-42.8625	-13.0391			-58.9448	-8.78269
														-2.55199	-3.56935	-2.78979	-4.93267	-4.99884	spike118					-41.2862	-12.3066			-58.4911	-7.98924
														-2.09423	-2.37916	-1.81323	-3.80352	-4.26642	spike119					-44.4387	-13.6494			-56.6765	-8.84373
														-2.91821	-2.19606	-2.08789	-3.04058	-4.26642	spike120					-42.4684	-12.978			-58.2643	-8.87425
														-3.16235	-2.13502	-2.14892	-5.23784	-4.81573	spike121					-39.71	-12.2761			-59.1716	-9.20994
														-2.55199	-2.31813	-1.99633	-6.06182	-4.7547	spike122					-43.6506	-13.4358			-61.4398	-9.60667
														-3.55907	-1.79933	-3.30859	-6.94683	-5.51764	spike123					-45.6208	-13.2832			-57.1302	-8.9658
														-3.86425	-3.05055	-2.85083	-6.64165	-5.88385	spike124					-45.6208	-13.5273			-58.9448	-8.53855
														-3.28442	-3.11158	-3.27807	-5.97027	-4.96832	spike125					-45.6208	-14.1072			-60.9862	-9.27098
														-4.26098	-3.05055	-3.58325	-4.93267	-5.05987	spike126					-46.0149	-15.45			-57.8107	-8.59959
														-3.89477	-2.07399	-2.85083	-5.87871	-5.15143	spike127					-49.9554	-15.6941			-62.1203	-10.0339
														-4.2915	-2.65382	-4.13256	-4.13921	-5.57867	spike128					-48.3792	-15.0837			-61.6667	-8.47752
														-5.11547	-3.50831	-4.55981	-8.77788	-5.54816	spike129					-51.1375	-15.1143			-62.8008	-9.57615
														-6.15307	-3.20314	-4.59033	-8.2896	-5.39557	spike130					-50.7435	-15.2363			-59.6252	-9.27098
														-5.69531	-5.43092	-4.10205	-7.86236	-5.02936	spike131					-51.5316	-16.2434			-59.6252	-8.9658
														-6.33617	-3.90504	-4.55981	-9.02202	-5.63971	spike132					-50.7435	-15.9688			-63.2544	-9.36253
														-6.64135	-3.44728	-4.7124	-8.65581	-6.21954	spike133					-54.29	-17.6167			-62.574	-10.2475
														-6.51928	-3.75245	-4.77343	-8.8084	-6.25006	spike134					-51.5316	-15.6331
														-7.2517	-4.1797	-4.92602	-9.99859	-6.64679	spike135					-52.7138	-16.5486
														-6.79394	-3.17262	-5.78051	-9.26616	-6.40265	spike136					-53.1078	-16.6707
														-8.31982	-3.63038	-5.50585	-10.6089	-6.55524	spike137					-50.7435	-15.9993
														-9.38793	-4.6985	-7.00122	-9.93755	-5.85333	spike138					-50.3494	-14.9312
														-9.72363	-5.55299	-7.09277	-9.23565	-5.76178	spike139					-50.3494	-14.8701
														-9.72363	-4.39332	-7.30639	-10.3953	-5.67023	spike140					-55.0781	-17.1589
														-10.395	-5.55299	-7.36743	-10.2427	-5.85333	spike141					-55.4721	-17.1284
														-11.6157	-5.55299	-7.12329	-10.4869	-5.51764	spike142					-57.0483	-18.044
														-10.5781	-5.15626	-8.1914	-11.0667	-5.91437	spike143					-56.2602	-18.3186
														-10.2729	-5.09523	-7.82519	-12.4095	-6.46368	spike144					-52.7138	-16.7012
														-11.5547	-5.09523	-7.6726	-12.6536	-5.94488	spike145					-56.6543	-17.1284
														-12.5007	-5.64454	-8.40502	-12.0433	-5.85333	spike146					-55.0781	-17.4336
														-13.2637	-5.27833	-9.32055	-12.0738	-5.73126	spike147					-54.684	-16.8232
														-12.1345	-5.58351	-9.229	-12.1959	-6.73834	spike148					-57.0483	-17.4336
														-12.6838	-5.67506	-10.3887	-13.2029	-7.13507	spike149					-55.0781	-16.2434
														-13.9045	-5.64454	-9.59521	-12.9283	-6.25006	spike150					-59.4126	-18.8679
														-14.4539	-5.52247	-9.32055	-14.5762	-7.50128	spike151					-57.0483	-16.7927
														-15.1863	-6.07179	-9.59521	-12.5926	-6.55524	spike152					-60.9888	-18.2271
														-15.0032	-5.52247	-9.25952	-13.5081	-7.68439	spike153					-59.0186	-18.6848
														-14.6064	-5.64454	-10.2056	-13.6302	-6.79938	spike154					-58.6245	-19.0205
														-15.2168	-6.46852	-11.3347	-12.9588	-6.12799	spike155					-59.4126	-18.5933
														-13.5994	-6.92628	-10.3887	-11.8907	-8.17267	spike156					-63.3532	-20.3023
														-19.3672	-6.56007	-10.4497	-11.8296	-7.07404	spike157					-61.3829	-19.2341
														-19.3977	-6.77369	-10.4497	-14.1185	-8.7525	spike158					-60.9888	-19.3562
														-19.4587	-6.438	-10.4802	-14.0879	-7.10455	spike159					-64.5353	-19.7529
														-16.0713	-5.88868	-10.6938	-15.0035	-8.29474	spike160					-60.5948	-18.8374
														-15.1252	-6.19386	-11.4568	-15.2781	-7.44025	spike161
														-16.0102	-7.17042	-12.0061	-13.6607	-7.92853	spike162
														-16.1323	-6.07179	-12.0977	-14.0879	-7.13507	spike163
														-15.9797	-7.84181	-10.8769	-14.3931	-8.32526	spike164
														-15.8577	-7.71974	-11.4263	-13.7828	-7.98956	spike165
														-16.4375	-7.23146	-11.3347	-14.3931	-7.86749	spike166
														-16.2544	-7.96388	-12.3113	-13.2029	-8.17267	spike167
														-17.0173	-7.90284	-12.5859	-15.8274	-8.2337	spike168
														-15.7356	-7.44508	-13.0132	-13.7522	-6.79938	spike169
														-16.1628	-7.23146	-12.647	-15.1866	-7.07404	spike170
														-16.468	-8.26906	-12.8911	-15.6443	-7.68439	spike171
														-16.3154	-7.78077	-13.4099	-15.98	-7.95904	spike172
														-16.1018	-8.23854	-13.5625	-15.5528	-7.68439	spike173
														-15.9492	-7.71974	-14.4475	-17.2618	-8.0506	spike174
														-16.1934	-8.1775	-14.417	-16.1937	-7.25714	spike175
														-16.3765	-11.5344	-14.1118	-16.3157	-7.44025	spike176
														-17.4751	-9.12355	-13.2573	-16.7125	-7.74542	spike177
														-16.6816	-7.07887	-13.9897	-15.7969	-6.82989	spike178
														-17.5666	-8.66578	-13.5625	-16.2242	-7.7149	spike179
														-16.8342	-9.917	-14.1728	-16.2852	-7.92853	spike180
														-17.5056	-8.42164	-14.8442	-16.9871	-8.59991	spike181
														-16.4375	-9.7339	-14.7832	-16.6819	-7.80646	spike182
														-16.9868	-23.2837	-13.654	-17.0787	-8.50836	spike183
														-16.8342	-23.2837	-13.593	-17.4754	-8.26422	spike184
														-16.6206	-9.27614	-13.9897	-18.3909	-8.11163	spike185
														-16.9868	-7.56715	-16.4006	-18.2078	-8.32526	spike186
														-17.7192	-8.5132	-15.9429	-17.4754	-7.89801	spike187
														-17.6277	-9.82545	-15.6377	-18.4825	-8.29474	spike188
														-18.2075	-9.18458	-16.126	-17.6585	-7.74542	spike189
														-17.8413	-9.30665	-15.3936	-18.8182	-7.62335	spike190
														-18.5432	-9.97804	-14.2034	-17.2007	-8.5694	spike191
														-17.9634	-8.97096	-15.1494	-17.9332	-9.24078	spike192
														-17.9939	-9.64235	-15.0884	-18.7571	-8.17267	spike193
														-17.6277	-9.2151	-15.6987	-18.9708	-7.92853	spike194
														-18.7263	-9.30665	-14.4475	-18.7266	-8.93561	spike195
														-18.177	-10.2222	-16.9805	-19.0623	-9.0882	spike196
														-17.8718	-10.3748	-14.9358	-19.5201	-8.66095	spike197
														-17.3225	-9.33717	-14.8442	-18.9097	-9.36285	spike198
														-17.2615	-10.4968	-16.6448	-18.9708	-8.41681	spike199
														-17.3225	-10.3748	-16.7974	-18.9402	-8.96613	spike200
														-19.4282	-10.3443	-16.3701	-19.1844	-9.42389	spike201
														-18.6653	-10.5579	-14.3254	-19.0013	-8.2337	spike202
														-18.2075	-10.9546	-15.5156	-19.1233	-8.53888	spike203
														-16.9868	-10.863	-17.4077	-18.1773	-8.53888	spike204
														-18.2075	-11.0767	-17.2246	-19.2149	-9.14923	spike205
														-18.0244	-11.3208	-16.5837	-17.9026	-8.35577	spike206
														-17.8718	-11.565	-17.2246	-17.9637	-9.21027	spike207
														-17.4446	-11.8701	-17.7129	-19.1539	-9.24078	spike208
														-19.062	-10.7105	-16.4617	-18.5435	-9.57648	spike209
														-19.3977	-10.9241	-17.072	-18.6045	-9.97321	spike210
														-18.4211	-10.802	-17.4993	-18.2688	-9.33234	spike211
														-18.7873	-10.8325	-17.4687	-18.9402	-8.90509	spike212
														-18.9094	-11.4734	-17.1941	-18.6351	-9.63751	spike213
														-19.3672	-11.626	-17.9265	-18.7876	-8.96613	spike214
														-18.238	-10.802	-17.2551	-19.9168	-10.4005	spike215
														-18.4517	-11.8701	-17.7129	-19.5506	-8.84405	spike216
														-17.9023	-11.1682	-18.1401	-19.1844	-9.94269	spike217
														-17.9939	-11.9006	-16.6143	-19.7032	-9.63751	spike218
														-18.2685	-11.9312	-18.8115	-19.7032	-9.33234	spike219
														-18.2991	-11.9312	-18.781	-19.5201	-9.72906	spike220
														-19.0925	-11.9006	-18.2622	-18.7266	-10.6141	spike221
														-19.3061	-11.9922	-19.1777	-19.1233	-10.3394	spike222
														-18.2991	-12.4194	-18.0181	-19.6727	-10.8582	spike223
														-18.7873	-11.565	-18.5369	-19.398	-11.1634	spike224
														-19.4282	-12.1753	-18.4148	-19.5811	-9.91217	spike225
														-19.4282	-11.1072	-18.8115	-17.9332	-11.1329	spike226
														-19.2146	-11.3818	-17.6824	-19.8863	-9.60699	spike227
														-19.4282	-13.0908	-18.2317	-20.4356	-10.6751	spike228
														-19.3977	-11.3513	-17.896	-18.9402	-9.45441	spike229
														-19.1536	-11.565	-17.3772	-19.7032	-10.3089	spike230
														-18.177	-11.1377	-19.0862	-19.2149	-11.1024	spike231
														-18.6348	-12.9382	-17.9265	-19.8863	-9.69855	spike232
														-19.062	-12.3584	-18.2622	-20.222	-9.85113	spike233
														-19.123	-12.6941	-18.2622	-20.3135	-9.75958	spike234
														-19.4282	-11.7175	-18.1706	-19.6421	-9.85113	spike235
														-19.3977	-13.1824	-17.6824	-19.5506	-9.39337	spike236
														-19.123	-11.5039	-20.0627	-20.4051	-11.0108	spike237
														-18.6958	-13.1214	-16.8584	-20.344	-9.42389	spike238
														-18.6348	-12.9382	-18.9031	-19.2454	-11.9874	spike239
														-18.9705	-13.2739	-19.5745	-21.5953	-10.8277	spike240
														-18.8179	-12.0838	-19.1472	-20.1304	-10.8582	spike241
														-18.6042	-12.9688	-19.6355	-20.8018	-11.2855	spike242
														-19.0925	-11.4124		-20.222	-10.9193	spike243
														-18.3296	-13.0908		-18.6351	-10.6751	spike244
														-19.3977	-13.1519		-20.6187	-11.0718	spike245
														-19.3672	-13.1824		-21.4427	-11.4075	spike246
														-18.8789	-14.0369		-20.7713	-10.7667	spike247
														-18.7873	-14.4946		-21.3816	-11.1939	spike248
														-19.4282	-14.0674		-20.8018	-11.0718	spike249
														-19.3977	-14.3726		-21.5953	-11.8958	spike250
														-18.4211	-13.7317		-20.9544	-11.5296	spike251
														-19.4282	-15.5628		-21.4122	-11.5296	spike252
														-19.2451	-15.2271		-20.6797	-11.1329	spike253
														-18.5737	-15.6848		-21.7173	-11.4991	spike254
														-18.177	-15.105		-21.8699	-10.9803	spike255
														-19.3977	-15.6543		-21.992	-11.4075	spike256
														-19.0315	-15.6238		-21.3816	-11.7432	spike257
														-18.8179	-14.4336		-21.0154	-11.2244	spike258
														-18.9399	-15.3491		-22.7549	-12.3536	spike259
														-19.3977	-14.1284		-22.1141	-11.5296	spike260
														-19.1536	-14.3421		-22.8465	-11.7432	spike261
														-18.7873	-16.936		-22.0225	-12.6893	spike262
														-19.3672	-16.8445		-22.9991	-12.9639	spike263
														-19.3977	-15.8679		-22.8465	-11.7432	spike264
														-19.3977	-17.3633		-21.8394	-11.8043	spike265
														-18.8789	-14.9829		-22.877	-12.6893	spike266
														-19.4282	-16.5088		-23.3653	-12.1094	spike267
														-19.4282	-16.1731		-23.5179	-12.0484	spike268
														-18.8484	-16.2952		-23.2737	-12.4756	spike269
														-18.6042	-16.3562		-23.0296	-12.3536	spike270
														-19.1841	-17.2107		-23.2737	-12.5367	spike271
														-19.4282	-15.5933		-23.6094	-11.9568	spike272
														-19.3977	-17.0886		-23.6094	-12.6282	spike273
														-19.3977	-15.0745		-24.8301	-11.9874	spike274
														-19.3672	-16.5698		-23.6399	-12.3841	spike275
														-19.062	-16.5393		-24.0367	-12.4756	spike276
														-19.3977	-15.6543		-22.877	-12.262	spike277
														-18.5737			-23.701	-12.6588	spike278
														-19.123			-23.9451	-12.14	spike279
														-19.3061			-24.1282	-12.201	spike280
														-19.4282			-23.9756	-12.4756	spike281
														-18.9705			-24.0367	-12.7503	spike282
														-18.7263			-23.7315	-12.1094	spike283
														-19.4282			-24.3724	-11.8958	spike284
														-19.4282			-24.9522	-12.3841	spike285
														-19.3977			-24.7081	-11.6212	spike286
														-19.4282			-23.8536	-12.7198	spike287
														-19.062			-25.5015	-11.438	spike288
														-19.3977			-25.3184	-12.3536	spike289
														-19.4282			-24.7996	-11.8653	spike290
														-19.2451			-24.6775	-12.8419	spike291
														-19.3977			-24.9522	-11.6822	spike292
														-19.4282			-24.8301	-11.5601	spike293
														-19.3977			-25.1048	-12.14	spike294
														-19.0925			-24.9827	-11.8958	spike295
														-19.4282			-25.8372	-11.8348	spike296
														-19.123			-25.1658	-12.8419	spike297
														-19.4282			-34.3821	-12.5062	spike298
														-19.3367			-24.9522	-12.9944	spike299
														-19.4282			-25.8372	-12.8113	spike300
