# Supplementary material for: Axonal mechanisms mediating γ-aminobutyric acid receptor type A (GABA-A) inhibition of striatal dopamine release
Source: eLife. 2020 Sep 1;9:e55729. doi: 10.7554/eLife.55729 (PMC7462615; doi:10.7554/eLife.55729)
Supplement: Figure 5—source data 1. [file elife-55729-fig5-data1.xlsx]

## Sheet: Sheet1
	Fig5C	Data are interms of normalized calcium signal, normalized to the average of the 10 minute baseline							Fig5F	Data are interms of normalized calcium signal, normalized to the average of the 10 minute baseline							Fig5I	Data are interms of normalized calcium signal, normalized to the average of the 5 minute baseline
	Time (min)						power		Time (min)								Time (min)
	0.5	1.50476	1.27193	1.20464	0.956932	0.880186	0.9		0.5	1.12102	1.07974	0.736276	0.790156	1.6322			0.5	0.902944	0.996003	0.965288	0.972068	0.989109	0.978923	1.01483	1.00118
	1	0.991399	1.15772	0.824056	1.08704	0.998998			1	1.06458	0.936497	0.902561	0.952194	1.02007			1	0.975675	0.967043	0.996642	1.00181	1.1455	0.981588	0.972447	1.05166
	1.5	1.26983	1.03371	0.832692	0.810884	0.828361			1.5	1.03386	0.967588	1.01105	0.84169	0.916426			1.5	0.923134	1.02694	0.979535	0.992761		0.958716	0.992588	1.01993
	2	0.996095	1.13545	0.960464	0.738047	1.5188			2	1.03241	0.864407	1.00089	0.83135	0.981205			2	0.915047	1.00944	0.956533	0.994882	0.999414	0.972857	0.971907	1.0454
	2.5	0.914822	0.897919	1.07555	1.22005	1.03634			2.5	0.990728	0.959843	1.01263	0.813358	1.02896			2.5	1.01435	0.911107	0.953474	1.00456	0.993287	0.916527	0.960095	0.939845
	3	1.02534	1.03554	1.25805	0.600009	0.789503			3	0.976579	1.00706	1.02237	0.886688	1.1755			3	0.855407	1.00093	0.994208	1.01738	1.02296	1.10575	0.998454	0.958803
	3.5	0.866602	0.971167	0.871896	0.8851	0.872146			3.5	0.941196	1.05351	1.02256	0.896018	0.912589			3.5	1.06215	1.0222	1.12104	0.970182	0.979865	0.943272	1.00284	1.05533
	4	0.896684	0.988659	0.855972	1.05269	0.997574			4	0.960625	0.987423	1.01475	1.04909	0.978857			4	1.21006	0.997758	1.00439	1.02854	1.00268	1.08733	0.970586	0.994453
	4.5	0.751118	0.81376	1.13305	0.935368	1.19684			4.5	0.950495	0.987539	0.986528	1.04745	1.06878			4.5	0.91632	1.02571	0.990868	1.01192	0.97881	1.0222	1.00204	1.01928
	5	0.858857	0.937166	1.23155	0.945128	1.11207			5	0.997771	1.0272	1.05939	1.13552	0.985177			5	1.22491	1.04287	1.03802	1.00589	1.01569	0.841441	1.02608	0.972132
	5.5	0.957968	1.01744	1.13722	0.997849	0.891562			5.5	1.02352	0.957354	0.953555	0.932578	0.938771			5.5	0.897017	1.05162	0.99845	0.97908	0.998091	1.00132	1.02718	1.04001
	6	0.853751	0.98301	0.971404	0.994939	0.942666			6	0.984531	1.01243	1.01033	0.824573	0.901258			6	0.911506	1.0714	1.00654	0.969112	0.955795	1.06221	0.990806	1.00429
	6.5	1.18541	0.975035	0.700275	1.13239	0.93561			6.5	1.02735	1.01007	1.08692	0.990392	1.0203			6.5	0.795071	1.08426	0.980332	0.953473	0.952145	1.07885	1.00179	1.01677
	7	0.905634	1.01464	1.00073	0.890926	1.09952			7	1.01123	1.01875	0.995238	0.995585	0.728997			7	0.899226	1.0278	1.0053	0.943951	1.02912	0.910988	0.980743	1.11279
	7.5	0.719161	0.912319	0.978526	1.0307	1.07488			7.5	0.951056	0.956894	1.05899	1.26391	1.06052			7.5	0.895899	1.05718	0.874375	0.9468	0.95447	1.00248	1.01003	1.08545
	8	1.12601	0.973698	1.18598	1.22684	0.808872			8	0.963036	1.0017	1.06902	0.658261	0.717847			8	0.904715	1.07218	0.948417	0.93142	1.03921	1.05674	1.00923	1.00772
	8.5	1.39908	0.980489	0.820078	1.0568	1.03046			8.5	1.01309	1.04199	1.08041	1.20805	0.772829			8.5	0.884205	1.15705	0.996193	0.923624	0.999529	0.95879	0.974609	1.00115
	9	0.840185	0.976256	0.987411	1.27394	0.85946			9	0.993964	1.02173	0.978666	0.968238	1.05158			9	0.869505	1.03739	1.03748	0.917899	0.971868	1.11396	1.01101	0.997707
	9.5	0.813946	0.9964	1.00289	1.0713	0.903461			9.5	0.969869	1.04224	1.0253	1.1099	0.912724			9.5	0.853604	1.03806	0.992118	0.915035	0.947572	0.856797	0.958154	0.948438
	10	1.12334	0.927697	0.967564	1.09307	0.946043			10	0.954941	1.05478	0.996914	1.25133	1.102			10	0.875777	1.0224	1.01074	0.904283	0.960092	0.968202	0.950863	1.06033
	10.5	0.812545	0.931728	0.956805	1.10771	1.08787			10.5	1.01356	1.00234	0.966641	1.34959	1.02003			10.5	0.87108	1.03001	1.00256	0.874966	0.981903	0.972432	1.0127	0.976026
	11	0.527497	0.958484	0.962473	1.39443	1.06796			11	1.02459	1.00892	1.009	1.2041	1.07338			11	0.848258	0.972905	0.894077	0.886042	0.935321	0.911325	0.980734	1.03246
	11.5	0.592113	0.921698	0.933239	1.15428	1.24214			11.5	1.0189	1.10895	0.994534	1.32691	0.959311			11.5	0.863956	1.03925	1.01017	0.85804	0.971891	1.01171	1.01379	1.02258
	12	0.704387	1.01815	0.969079	0.921276	1.03706			12	1.00526	1.06133	1.04161	1.01144	1.00901			12	0.856572	1.04556	1.11765	0.830369	1.00335	1.00292	0.992155	0.991588
	12.5	0.636092	0.943812	0.694669	1.20267	0.724537			12.5	0.958415	0.977457	0.999143	1.14294	0.805512			12.5	0.828214	1.06202	1.06841	0.803022	1.01815	0.940297	0.946318	0.869071
	13	0.921087	0.732354	0.95618	1.00152	0.551517			13	0.897084	0.975809	1.02289	1.16159	1.08932			13	0.846758	1.03697	0.972772	0.813039	0.960004	1.03828	0.989584	1.00957
	13.5	0.546218	0.679905	0.807772	0.960999	0.530202			13.5	1.04634	0.946229	0.926364	1.19757	0.943872			13.5	0.849123	1.03067	1.01072	0.805299	0.972374	1.00855	0.951559	0.985629
	14	0.848833	0.644057	0.903826	0.991975	0.655521			14	0.971202	0.905999	0.887747	1.26058	1.02991			14	0.853157	1.05394	1.07102	0.809797	0.915339	1.03398	0.965749	0.996254
	14.5	0.882045	0.65478	1.28412	1.20417	0.641898			14.5	1.04727	0.983483	0.962746	1.20277	0.957324			14.5	0.906793	1.06138	1.05221	0.83313	0.914997	1.02782	0.984809	0.999094
	15	0.804121	0.635273	0.992428	0.952619	0.147854			15	0.980878	0.98591	0.923853	1.11176	1.25183			15	0.837741	1.04138	1.01383	0.8158	0.914368	1.05642	0.985152	1.02946
	15.5	0.703798	0.570054	0.992123	0.995798	0.23714			15.5	0.994208	1.02875	0.904178	1.02988	0.981159			15.5	0.798227	1.03834	1.03104	0.761826	0.931988	0.98818	0.960494	1.01984
	16	0.682383	0.444611	0.798018	0.909273	0.704917			16	1.01997	0.946336	0.895044	1.12858	1.04648			16	0.861275	1.0381	0.999406	0.772563	0.920005	0.994272	1.00499	0.940972
	16.5	0.613217	0.45414	1.07255	0.91483	0.864038			16.5	1.00892	0.942071	0.943666	1.24263	1.07627			16.5	0.836041	1.05702	1.00453	0.782252	0.909013	0.911892	1.01286	1.00659
	17	0.719715	0.277477	0.832442	0.691814	0.226469			17	1.0516	0.938799	0.866046	1.13234	1.05804			17	0.820334	1.01647	0.984159	0.788099	0.887745	0.854874	0.960701	1.02208
	17.5	0.555693	0.121283	1.00747	0.744515	0.00123684			17.5	0.977064	0.955888	0.815098	1.19718	0.853272			17.5	0.824202	1.00433	1.02698	0.751968	0.845781	0.967278	0.999741	0.983324
	18	0.758466	0.118982	0.926623	1.00802	0.362957			18	0.995798	0.918798	0.869874	1.19946	1.0156			18	0.866442	1.0324	1.00233	0.800253	0.822826	0.995014	1.05639	1.01845
	18.5	0.623203	0.0059029	1.00052	0.913066	0.0525591			18.5	0.912438	0.919289	0.884601	1.46031	0.988924			18.5	0.591549	1.03711	1.03006	0.81201	0.838375	1.0199	1.02156	0.898035
	19	0.36746	0.09522	0.920999	0.658661	-0.0681041			19	1.02054	0.894779	0.844419	1.38765	1.23508			19	0.990833	1.02381	1.01917	0.783993	0.878951	1.0247	0.961369	1.04322
	19.5	0.459781	0.0925205	0.762402	0.823125	-0.0122305			19.5	0.972633	0.888507	0.911687	1.22992	0.823479			19.5	0.869253	1.05619	1.00861	0.764198	0.858114	0.870183	0.970849	0.950718
	20	0.244804	0.047391	1.09182	0.52088	0.483485			20	0.916387	0.812758	0.838153	1.31608	0.959762			20	0.800833	1.0233	1.05879	0.757724	0.855149	0.948305	0.969754	1.0261
	20.5	0.454985	0.00329532	0.841873	1.01885	0.155257			20.5	0.933394	0.887434	0.859076	1.22475	0.884195			20.5	0.834114	1.05825	0.995492	0.772464	0.836105	1.0514	1.0154	0.982815
	21	0.529345	0.0433795	0.708797	0.743921	0.0738034			21	0.92059	0.842781	0.82723	1.36846	0.924506			21	0.886891	1.03199	1.01016	0.763033	0.884858	1.02722	1.00291	1.02245
	21.5	0.208792	0.00300859	0.565203	0.595867	-0.0865766			21.5	0.958934	0.802784	0.825157	1.04664	0.968158			21.5	0.863775	1.03318	1.02434	0.77123	0.83215	1.00242	1.02008	0.992557
	22	0.27389	-0.0353282	0.966364	0.911755	0.0627474			22	0.925713	0.827608	0.848273	1.0279	0.863339			22	0.856697	1.0176	1.04591	0.752547	0.848757	0.974895	1.01988	0.925714
	22.5	0.359739	-0.0691085	0.664167	0.521688	0.196473			22.5	0.939168	0.791548	0.798646	1.28772	0.894081			22.5	0.839636	1.06542	1.05968	0.767786	0.811563	1.01548	0.959503	0.918347
	23	0.422669	-0.0982768	0.738945	0.542188	-0.209658			23	0.935059	0.784807	0.713125	1.40271	0.740553			23	0.811962	1.03502	1.06099	0.72824	0.846903	1.04169	0.954328	1.02051
	23.5	0.523821	-0.0950231	0.782457	0.612446	0.161859			23.5	0.937953	0.752822	0.720102	1.06746	1.00183			23.5	0.858349	1.02951	1.07076	0.805261	0.833068	1.10605	1.00803	0.99199
	24	-0.041497	-0.198159	0.699755	0.634241	0.303584			24	0.883764	0.70621	0.602698	1.40271	0.786237			24	0.850822	1.06363	1.04566	0.77014	0.871877	1.08503	0.987135	0.957233
	24.5	0.783736	-0.0884225	0.861762	0.453072	0.0931212			24.5	0.83809	0.799037	0.731557	1.31143	0.789126			24.5	0.834839	1.05086	0.978673	0.760592	0.838817	0.992302	0.974478	1.05325
	25	0.434562	-0.183783	0.427491	0.509829	0.0156385			25	0.871898	0.759124	0.726199	1.25432	0.866048			25	0.872881	1.05672	1.01469	0.807874	0.856772	0.966744	1.00594	0.97398
	25.5	0.391386	-0.0674304	0.620129	0.623712	-0.0419391			25.5	0.805617	0.782703	0.670436	1.14453	1.21224
	26	0.310837	-0.164299	0.503737	0.572505	0.136582			26	0.787818	0.697069	0.678663	1.36845	0.700828
	26.5	0.693264	-0.047167	0.5953	0.585877	0.0256778			26.5	0.994365	0.758481	0.702036	1.46979	0.659117
	27	0.970786	-0.0613934	0.623986	0.617252	0.030792			27	0.908528	0.792719	0.645991	1.80767	0.95123
	27.5	1.07013	-0.0961369	0.776628	0.848328	-0.154707			27.5	0.893745	0.748878	0.695118	1.62823	0.60585
	28	0.528176	-0.0446579	0.563919	0.691612	0.0855778			28	0.846114	0.760705	0.613046	1.52078	1.02048
	28.5	1.01569	0.0782149	0.656392	0.707127	-0.250778			28.5	0.812928	0.786365	0.66043	1.32523	0.738341
	29	1.10811	0.0654756	0.757808	0.94073	0.00688271			29	0.844428	0.77563	0.683581	1.3713	0.590862
	29.5	1.10736	-0.0235713	0.682095	0.837169	0.0698392			29.5	0.834838	0.76765	0.686353	1.1285	0.446544
	30	0.733456	0.0112693	0.54416	0.721167	0.251179			30	0.807432	0.752283	0.674478	1.41603	0.542154
	30.5	1.28371	0.0860581	0.405936	0.621654	0.181978			30.5	0.809145	0.736739	0.734716	1.3341	0.528205
	31	1.04471	0.166813	1.07604	0.783842	0.000960998			31	0.7303	0.719209	0.663292	1.23863	0.463969
	31.5	0.986361	0.107147	0.809364	0.85348	0.167543			31.5	0.771335	0.658344	0.704257	1.15684	0.3373
	32	1.30621	0.167675	0.744714	0.718969	0.122877			32	0.759148	0.656012	0.668766	1.34955	0.444106
	32.5	1.51975	0.195833	0.634248	0.933029	0.416039			32.5	0.739908	0.742921	0.723307	1.23539	0.825375
	33	0.993104	0.183781	0.580797	0.756493	0.371982			33	0.681006	0.687936	0.575177	1.27976	0.654693
	33.5	1.14891	0.355889	0.771933	0.855139	0.275295			33.5	0.732668	0.666924	0.630938	1.0281	0.999126
	34	1.33514	0.274983	0.697608	0.75179	0.162398			34	0.670226	0.730329	0.689099	1.01402	0.746105
	34.5	1.26921	0.377287	0.749025	0.733139	0.274034			34.5	0.754524	0.666651	0.754258	0.764374	0.718117
	35	1.21563	0.249982	0.449081	1.04562	0.0343846			35	0.672379	0.708122	0.821126	1.16019	0.887896
	35.5	1.40749	0.503115	0.736378	0.818975	0.31377			35.5	0.746869	0.66527	0.826645	1.2892	0.568698
	36	1.56495	0.324597	0.688973	0.932032	0.020597			36	0.743399	0.67628	0.789359	1.1593	0.868214
	36.5	1.81856	0.434215	0.731003	0.831621	-0.154349			36.5	0.726024	0.668993	0.865901	1.21804	0.806505
	37	1.16792	0.361031	0.795619	0.706704	-1.37562			37	0.751027	0.612338	0.824403	1.2519	0.870291
	37.5	1.27253	0.52375	1.0145	0.684009	0.567948			37.5	0.744351	0.606163	0.831644	1.33423	0.701144
	38	1.3946	0.108025	0.6218	0.973233	-0.101899			38	0.747354	0.634841	0.85677	1.57441	0.684758
	38.5	1.51013	0.619636	0.857825	1.06365	-0.0108691			38.5	0.734153	0.58963	0.853943	1.41929	0.846682
	39	1.08825	0.570683	0.744508	0.756929	0.23603			39	0.783425	0.615628	0.825031	1.47986	0.890514
	39.5	1.77041	0.59344	0.727273	1.10734	0.419138			39.5	0.765258	0.599767	0.874056	1.35738	0.91918
	40	1.3898	0.45986	0.970098	0.993913	0.0748978			40	0.782521	0.621316	0.800229	1.51219	0.922565
