# Supplementary material for: Axonal mechanisms mediating γ-aminobutyric acid receptor type A (GABA-A) inhibition of striatal dopamine release
Source: eLife. 2020 Sep 1;9:e55729. doi: 10.7554/eLife.55729 (PMC7462615; doi:10.7554/eLife.55729)
Supplement: Figure 6—source data 1. [file elife-55729-fig6-data1.xlsx]

## Sheet: Sheet1
Fig5A	dLight imaging of dopamine release and bath perfusion of diazepam, without nAChRs inhibited						Fig5B	dLight imaging of dopamine release and bath perfusion of diazepam, with D2, GABAB, mAChRs, nAChRs inhibited								Fig5D	Data are the input resistance values, normalized to the average of the first 5 trials					Fig5E	Data are the peak currents evoked by muscimol puff, normalized to the average of the first 5 trials						Fig5G	Data are the input resistance values, normalized to the average of the first 5 minutes							Supplement A	voltammetry data normalized to first 10 minutes of peak optical evoked DA release										Supplement B	Increase above baseline in dopamine release, averaged over last 5 minutes
	slice 1	slice 2	slice 3	slice 4	slice 5			slice1	slice2	slice3	slice4	slice5	slice6	power		axon1	axon2	axon3	axon4	axon5		axon1	axon2	axon3	axon4	axon5	axon6		0.695553	0.98907	0.99371	1.08466	0.769987	0.840485	1.11474
	1.53321	0.808436	0.97627	0.965674	1.05082		Baseline	1	1	1	1	1	1	0.86		0.997793	0.886604	1.02179	1.09735	0.91179		0.771903	1.53362	0.812752	0.794302	1.18624	0.995524		0.703748	0.69839	0.996982	1.10865	0.994884	0.891276	0.961992		slice1	slice2	slice3	slice4	slice5	slice6	slice7	slice8	slice9	slice10		slice1	120.487
	0.97272	1.13634	1.0304	1.13037	0.84153		Diazepam	0.800465	0.78563	0.889804	0.918625	0.53365	0.908041			0.996893	1.03233	1.01092	1.07445	1.10964		1.12067	0.846808	0.855556	0.980918	1.22553	0.970381		0.9223	1.03299	0.909397	0.970157	0.963152	0.924147	1.03337		96.9482	99.6274	100.07	103.539	100.331	97.5434	101.69	103.245	97.1756	94.09		slice2	97.784
	0.738228	0.923977	0.866782	0.958899	1.06935		Antagonists	1.22518	0.878808	1.43532	0.962446	0.757861	0.89231			1.03923	1.00166	1.01469	1.02072	1.00192		0.89092	1.16447	0.748738	0.694776	0.906567	0.91706		1.05852	1.05635	0.950183	1.13411	1.0422	1.22994	0.930657		101.257	96.3925	99.1561	102.359	102.476	98.4829	98.7501	97.4469	100.032	100.679		slice3	90.1891
	0.574552	1.21497	1.22117	1.01892	1.05734											0.978361	1.04352	0.936233	0.983446	0.959744		1.10469	0.704735	1.30346	1.191	0.710214	0.966133		1.02452	0.856187	1.08396	0.986699	0.931451	1.12386	1.0008		100.273	99.7456	100.42	104.447	95.7224	99.9127	100.398	98.4982	97.2286	102.833		slice4	110.063
DZP Applied here	1.18129	0.916279	0.905372	0.926137	0.980959											0.987719	1.03588	1.01637	0.82403	1.0169		1.13241	0.763829	1.29389	1.23808	0.963287	1.03643		1.1011	1.04767	0.962732	1.01093	0.82321	0.704608	1.03444		104.278	98.5131	105.552	100.073	101.674	98.8872	97.2382	102.608	100.861	99.5242		slice5	110.102
	1.10813	0.682612	0.849442	1.07763	0.959217											1.0311	1.01194	0.945054	0.930886	0.977982		0.979403	0.98654	0.985604	1.10093	1.00817	1.11447		1.08565	0.979476	1.03329	1.15398	0.941971	0.918908	1.02279		97.2441	105.722	94.8023	89.5825	99.7972	105.174	101.924	98.2024	104.702	102.874		slice6	119.385
	0.23251	0.728203	0.856077	0.718726	0.780752											1.16828	0.9591	0.915124	0.917409	0.981743		1.87485	1.17574	1.32592	1.45977	1.20335	1.47054		1.06187	1.06844	1.11784	0.93251	1.38815	1.04409	0.967281				91.2752	106.273	99.4362	95.7317	106.982	95.5601	84.6122	104.105		slice7	124.238
	0.269818	0.553002	1.66422	1.01767	0.926799											0.987455	1.07426	0.883278	0.965853	0.993384		1.94982	0.879549	1.75074	1.62053	1.26981	1.89848		1.14825	1.09344	0.941755	0.88986	1.13139	1.58663	0.996096		93.4267	90.683	84.2719	106.481	100.463	103.515	106.068	99.7204	88.4501	117.666		slice8	144.304
	0.584294	0.466268	0.548079	0.840489	0.828995											0.916957	0.997917	0.799798	1.06366	0.933116		1.52693	1.48479	1.89839	1.76546	1.30486	2.05855		1.19849	1.17799	1.01015	0.728455	1.01361	0.736056	0.93785		99.1364	102.078	94.5098	103.35	106.292	102.712	110.735	108.115	102.436	111.839		slice9	104.314
	0.471596	0.552359	0.421475	0.783158	0.855215												1.03148	0.764001	0.88035	0.971206		1.47856	1.73798		2.77708	1.46626	2.03897		1.12633	1.03185	0.9755	0.989085	0.985099	1.26724	0.957236		99.2296	105.867	100.7	109.688	109.11	110.835	116.189	112.067	98.462	111.379		slice10	129.538
	0.14277	0.228865	0.50819	0.784129	0.853623												0.980481	0.93551	1.27432	0.928995		1.56765	1.35147		2.76755	1.23964	1.9817		1.05469	1.11622	1.13473	1.05474	0.872611	1.43543	0.92185		135.703	84.5656	97.9544	101.525	103.472	112.439	118.978	123.56	97.558	117.482
	0.507635	0.223778	0.325115	0.670494	0.853022												1.02457	0.791902	0.88689	0.917694		1.8108	1.27895		2.40295	1.49455	2.44785		0.974974	1.1189	0.99668	0.975238	0.904268	0.898138	0.804271		109.082	128.835	85.7874	118.219	105.552	116.651	114.602	127.762	102.11	126.897
	0.484807	0.190906	0.342184	0.636363	0.83326												1.03808	0.810338	0.969914	0.869363		1.87825	1.12338		3.21844	1.20376	1.93037		1.06095	0.937849	0.871337	0.84388	0.603917	0.835503	0.847328		125.02	100.869	85.7137	112.741	107.064	115.463	119.524	137.993	100.062	129.326
																													0.941478	1.11088	1.09302	0.863615	0.613932	1.13582	0.934126		122.81	102.078	89.4958	120.804	107.414	115.259	122.168	130.978	100.878	121.371
																													0.943603	1.13352	0.946433	0.910767	0.559791	1.08084	0.854564		109.475	103.571	85.6693	101.437	106.718	114.103	121.038	133.763	101.034	126.905
																													0.965471	0.91537	1.00435	0.829012	0.470778	0.987225	0.723833		116.182	109.198	91.3538	107.321	108.5	117.094	127.023	138.527	105.306	121.468
																													0.968987	0.808766	0.994055	1.11365	0.541054	1.07667	0.559095		113.824	114.781	93.5289	107.273	100.398	118.274	118.908	144.782	106.249	127.156
																													1.04685	0.99891	0.814874	0.869102	0.480321	0.589663	0.617251		122.934	84.7384	99.8044	103.492	106.886	121.431	126.604	137.193	100.396	125.552
																													1.04835	1.05054	0.763796	0.803304	0.537867	0.829876	0.479691		119.135	90.3978	94.2657	107.081	113.267	116.855	122.532	144.461	104.483	133.268
																													0.891663	0.829811	0.957531	1.09007	0.599811	0.762813	0.647989		124.998	105.101	94.3136	121.556	114.262	119.248	127.214	153.056	102.653	130.075
																													0.988088	0.837331	0.829591	0.78968	0.696329	1.16465	0.677286		121.546	93.9014	69.0328	110.912	115.699	121.116	125.931	142.027	107.791	131.639
																													0.912942	0.73433	0.796051	0.622387	0.878872	1.17085	0.585637
																													0.985438	1.0081	0.863818	0.882609	0.519995	0.976091	0.5617
																													0.936584	0.900144	1.00132	0.872327	0.566743	0.868561	0.512502
																													0.939211	0.955801	0.715208	0.981569	0.314174	0.94518	0.505562
																													0.94534	0.726096	0.521497	0.910815	0.548837	0.91248	0.507808
																													1.01762	0.98002	0.490675	0.724134	0.519271	0.434576	0.472241
																													1.09579	0.983505	0.816146	0.461014	0.582512	0.768444	0.454775
																													0.969056	0.927558	0.704778	0.925201	0.47537	1.0741	0.474552
																													0.965653	0.626064	0.508778	0.817827	0.646213	0.833125	0.445642
																													1.03428	0.996037	0.898786	0.896199	0.904087	1.336	0.513557
																													1.27133	1.02009	0.835697	0.887155	0.537117	1.10843	0.319332
																													1.37013	1.06985	0.599691	0.803204	0.603175	0.585364	0.443341
																													1.44537	1.00358	0.826788	0.935498	0.597465	1.03389	0.371853
																													1.49403	0.984702	0.755379	0.819387	0.611573	0.98416	0.316421
																													1.50688	1.00146	0.785232	1.54645	0.642016	0.908998	0.404316
																													1.28124	0.986638	0.829704	1.57202	0.355782	1.28406	0.416804
																													1.56748	0.826679	0.730632	2.66746	0.467047	1.26127	0.4512
																													1.80328	0.903449	0.705857	1.62912	0.546695	1.03421	0.416581
[truncated: 14 more columns]
