# Supplementary material for: Axonal mechanisms mediating γ-aminobutyric acid receptor type A (GABA-A) inhibition of striatal dopamine release
Source: eLife journal article supplement (doi:10.7554/elife.55729), 2020-09-01
Supplement: figures [file elife-55729-figures-v1.pdf]

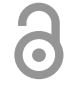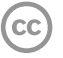

---

## Figures and figure supplements

Axonal mechanisms mediating  $\gamma$ -aminobutyric acid receptor type A (GABA-A) inhibition of striatal dopamine release

**Paul F Kramer *et al***

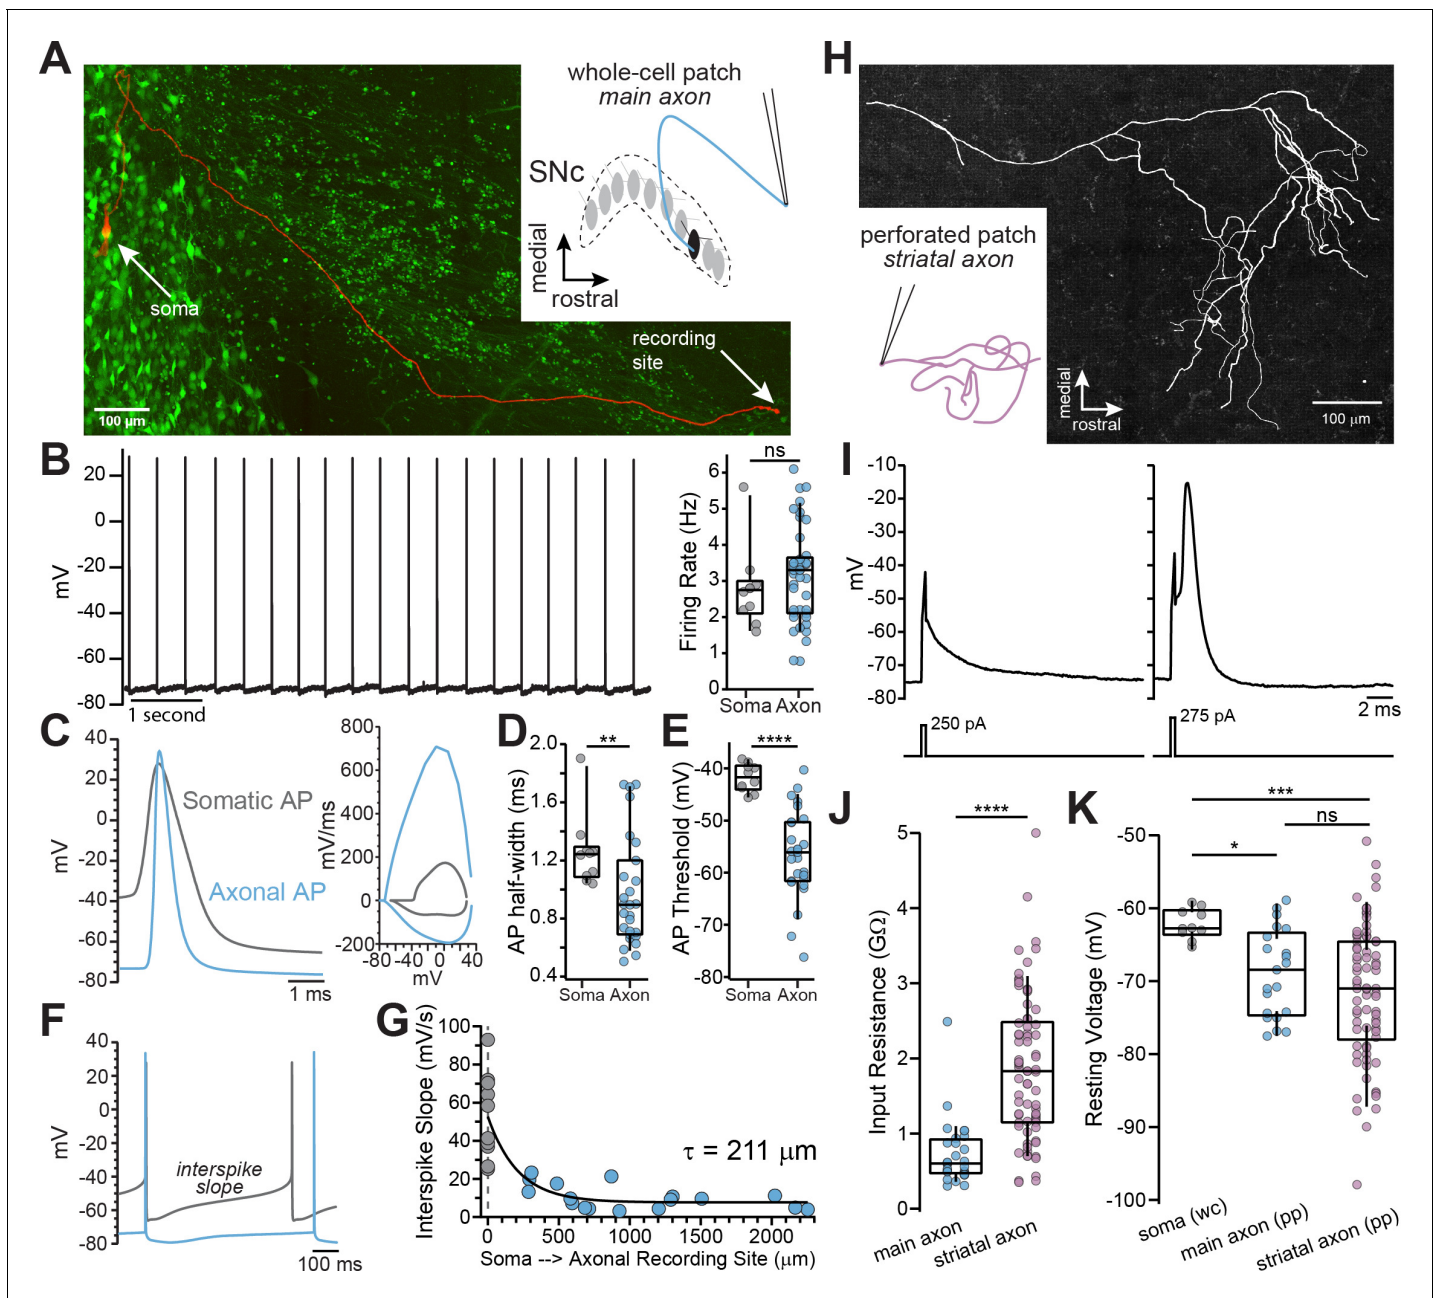

**Figure 1.** Whole-cell and perforated-patch recordings from dopamine neuron axons. (A) Main axon recorded in whole-cell mode with a connected soma (filled with neurobiotin, imaged with streptavidin-Cy5, slice cleared with CUBIC, red); GFP driven by the TH promoter (green). (B) Trace of spontaneous action potentials recorded from a dopaminergic axon (left). Firing rate from somatic ( $n = 10$ ) and axonal recordings ( $n = 41$ ;  $p = 0.298$ ) (right). (C) Overlay of an axonal and somatic spike (left). Phase plot for a somatic and axonal action potential (right). (D) Half-peak widths from somatic ( $n = 10$ ) and axonal ( $n = 27$ ) APs (\*\* $p = 0.008$ ). (E) AP thresholds recorded from soma ( $n = 10$ ) and axons ( $n = 26$ ) (\*\*\*\* $p < 0.0001$ ). (F) Example traces of interspike voltage from obtained from axonal (blue) and somatic (gray) recordings. (G) Slope of interspike voltage plotted against recording distance between axonal recording site (blue) and soma (gray). (H) Post-hoc reconstruction of a patched striatal axon. (I) Trace of subthreshold depolarization (left) and axonal AP (right) evoked by 250 pA and 275 pA current injection. (J) Input resistance values for main axon ( $n = 28$ ) and striatal axons ( $n = 74$ ) APs (\*\*\*\* $p < 0.0001$ ). (K) Comparison of the mean interspike voltage between soma ( $n = 10$ ) main axon ( $n = 21$ ) and striatal axon, which was measured as the average resting membrane potential ( $n = 74$ ) (\* $p = 0.032$ ; \*\*\* $p = 0.0007$ ; ns  $p = 0.87$ ).

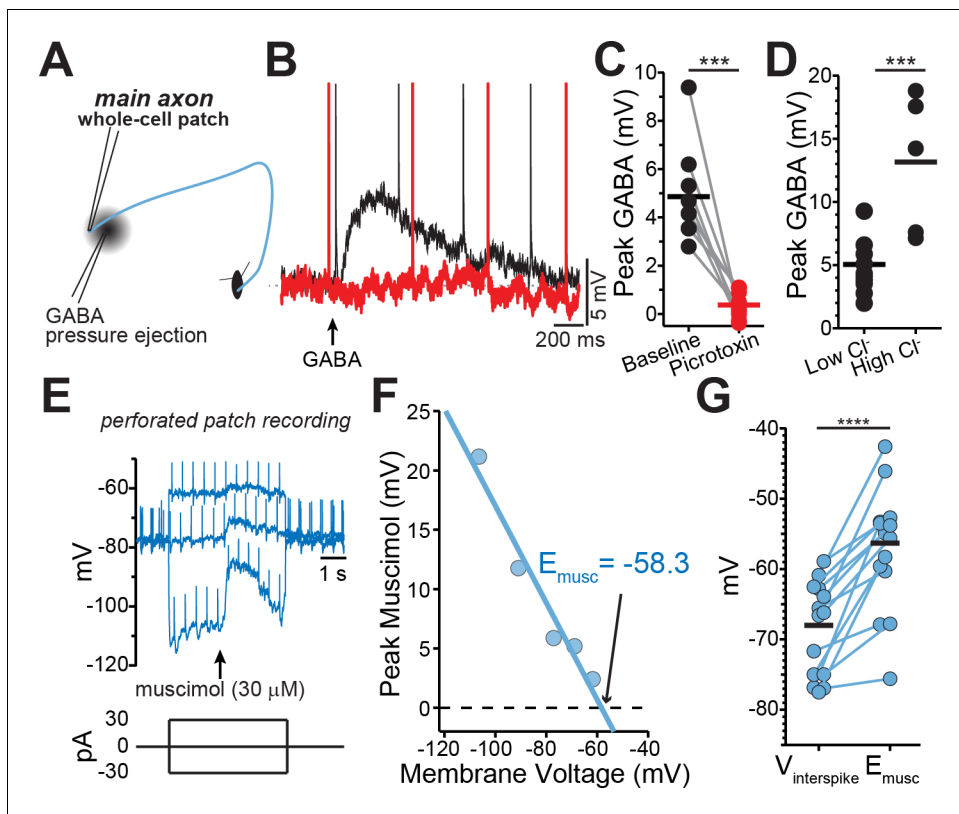

**Figure 2.** GABA-A receptors located on the axons of dopaminergic neuron are depolarizing. (A) Schematic of experimental setup. (B) Example traces of pressure ejection of GABA onto the axon in control (black) and after application of picrotoxin (red). (C) Peak of amplitude of GABA-evoked depolarization in control and after picrotoxin ( $n = 9$ ;  $***p=0.0003$ ). (D) Peak amplitude of GABA-evoked depolarization recorded with low ( $n = 5$ ) or high ( $n = 10$ ) chloride internal solutions ( $***p=0.0008$ ). (E) Example traces overlaid from three different current injections. Timing of muscimol puff application indicated by arrow. (F) Peak of the muscimol-evoked depolarization plotted against the average interspike voltage. Fitted line was used to determine the reversal potential. (G) Paired values indicating mean interspike voltage ( $V_{\text{interspike}}$ ) and muscimol reversal potential ( $E_{\text{musc}}$ ) in individual axons ( $n = 15$ ;  $****p<0.0001$ ).

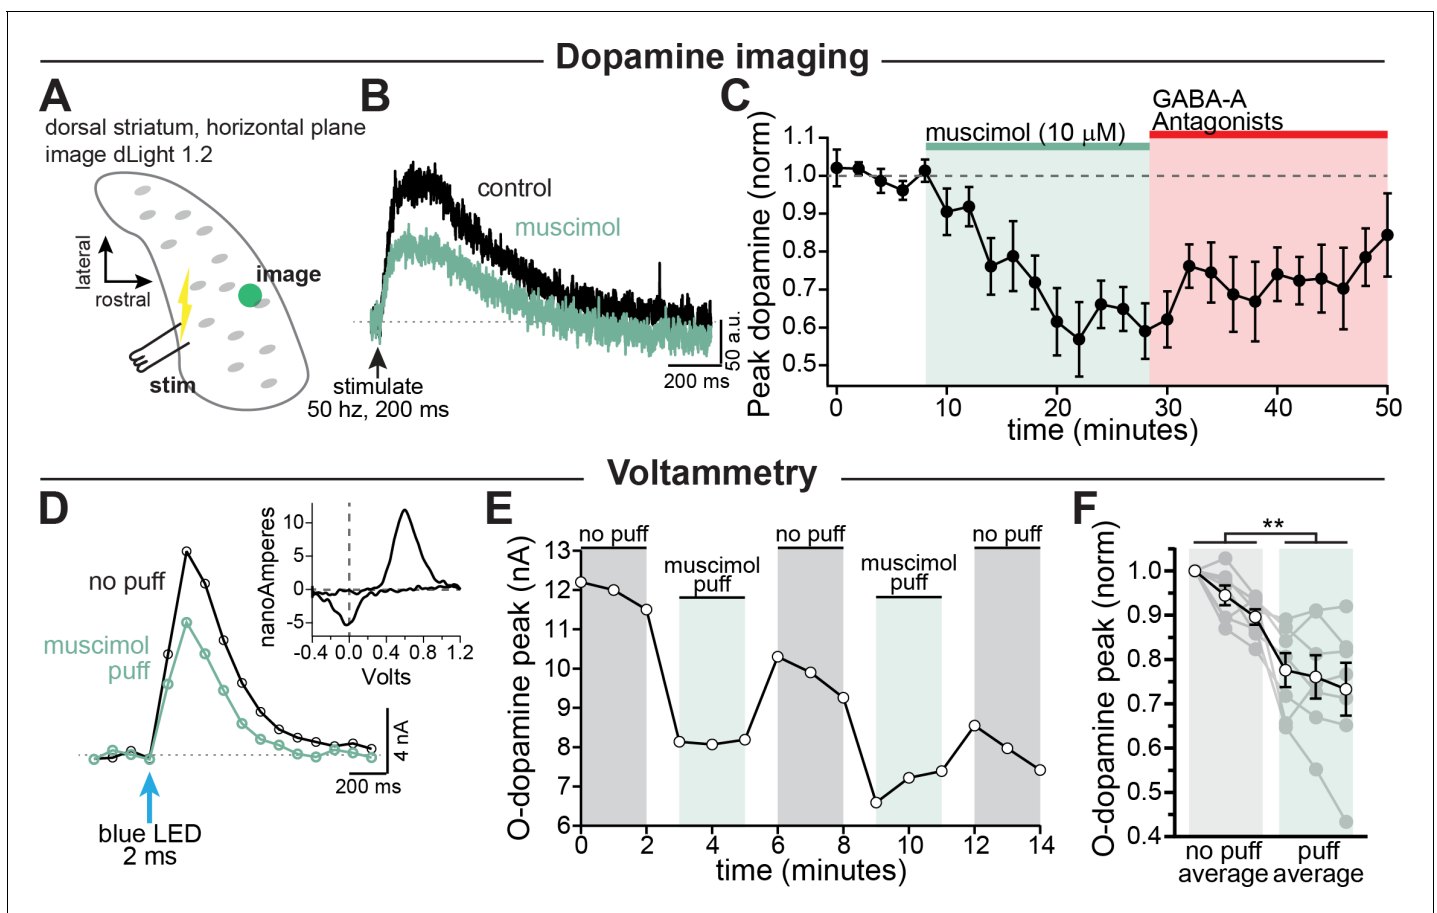

**Figure 3.** GABA-A receptor mediated inhibition of striatal dopamine release. (A–C) Imaging dopamine release in the dorsal medial striatum using dLight 1.2. (A) Experimental setup diagram. (B) Example traces of bulk dopamine release following electrical stimulation in control (black) and during muscimol bath application (green). (C) Group data showing the time course of dopamine release peak amplitude measured distal to the site of stimulation (average  $1054 \mu\text{m}$ ,  $n = 9$ ;  $p = 0.0008$ ). (D–F) Voltammetry experiments using opsin-evoked dopamine release (DAT-Cre injected with CoChR in SNc). (D) Example voltammetry signal of dopamine in control (black) and during muscimol puff (green). Inset: example current-voltage plot of FSCV signal. (E) Time course of opsin-evoked dopamine release in an example experiment. (F) Summary data showing the main effect of muscimol puff on dopamine release measured with voltammetry. Closed symbols indicate individual experiments and open symbols indicate averaged data ( $p = 0.004$ ;  $n = 7$ ). All experiments in (A–C) were done in the presence of hexamethonium chloride ( $200 \mu\text{M}$ ), sulpiride ( $1 \mu\text{M}$ ), atropine ( $30 \text{ nM}$ ), and CGP 55845 ( $200 \text{ nM}$ ) to block nAChRs, D2Rs, mAChRs, and GABA-BRs respectively.

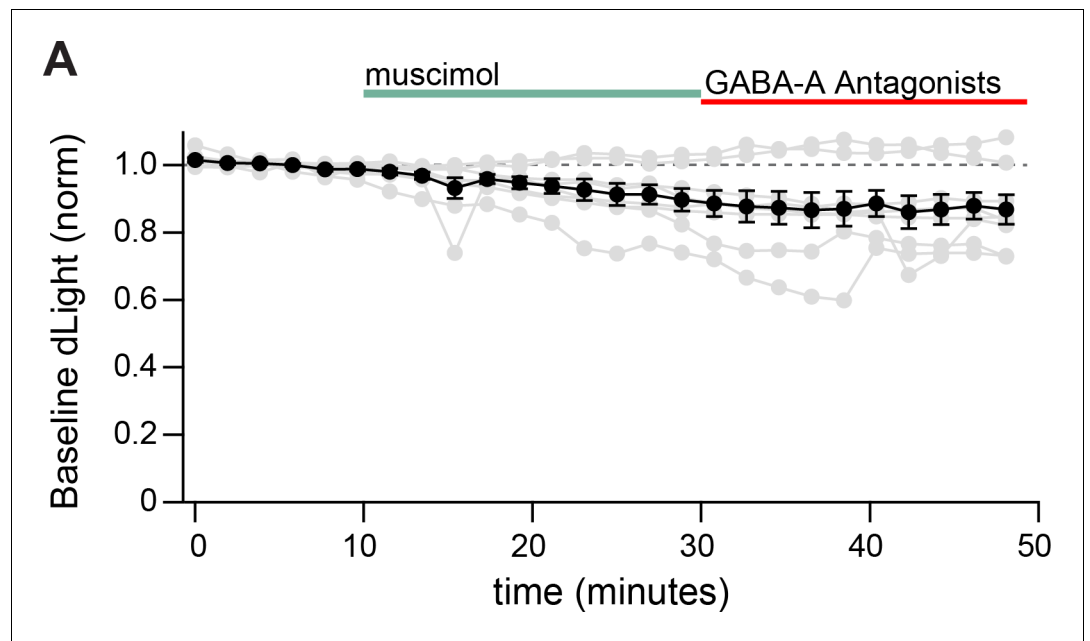

**Figure 3—figure supplement 1.** GABA-A activation does not affect baseline dLight levels. (A) Bath perfusion of muscimol did not significantly alter the pre-stimulation (baseline) dLight signal.

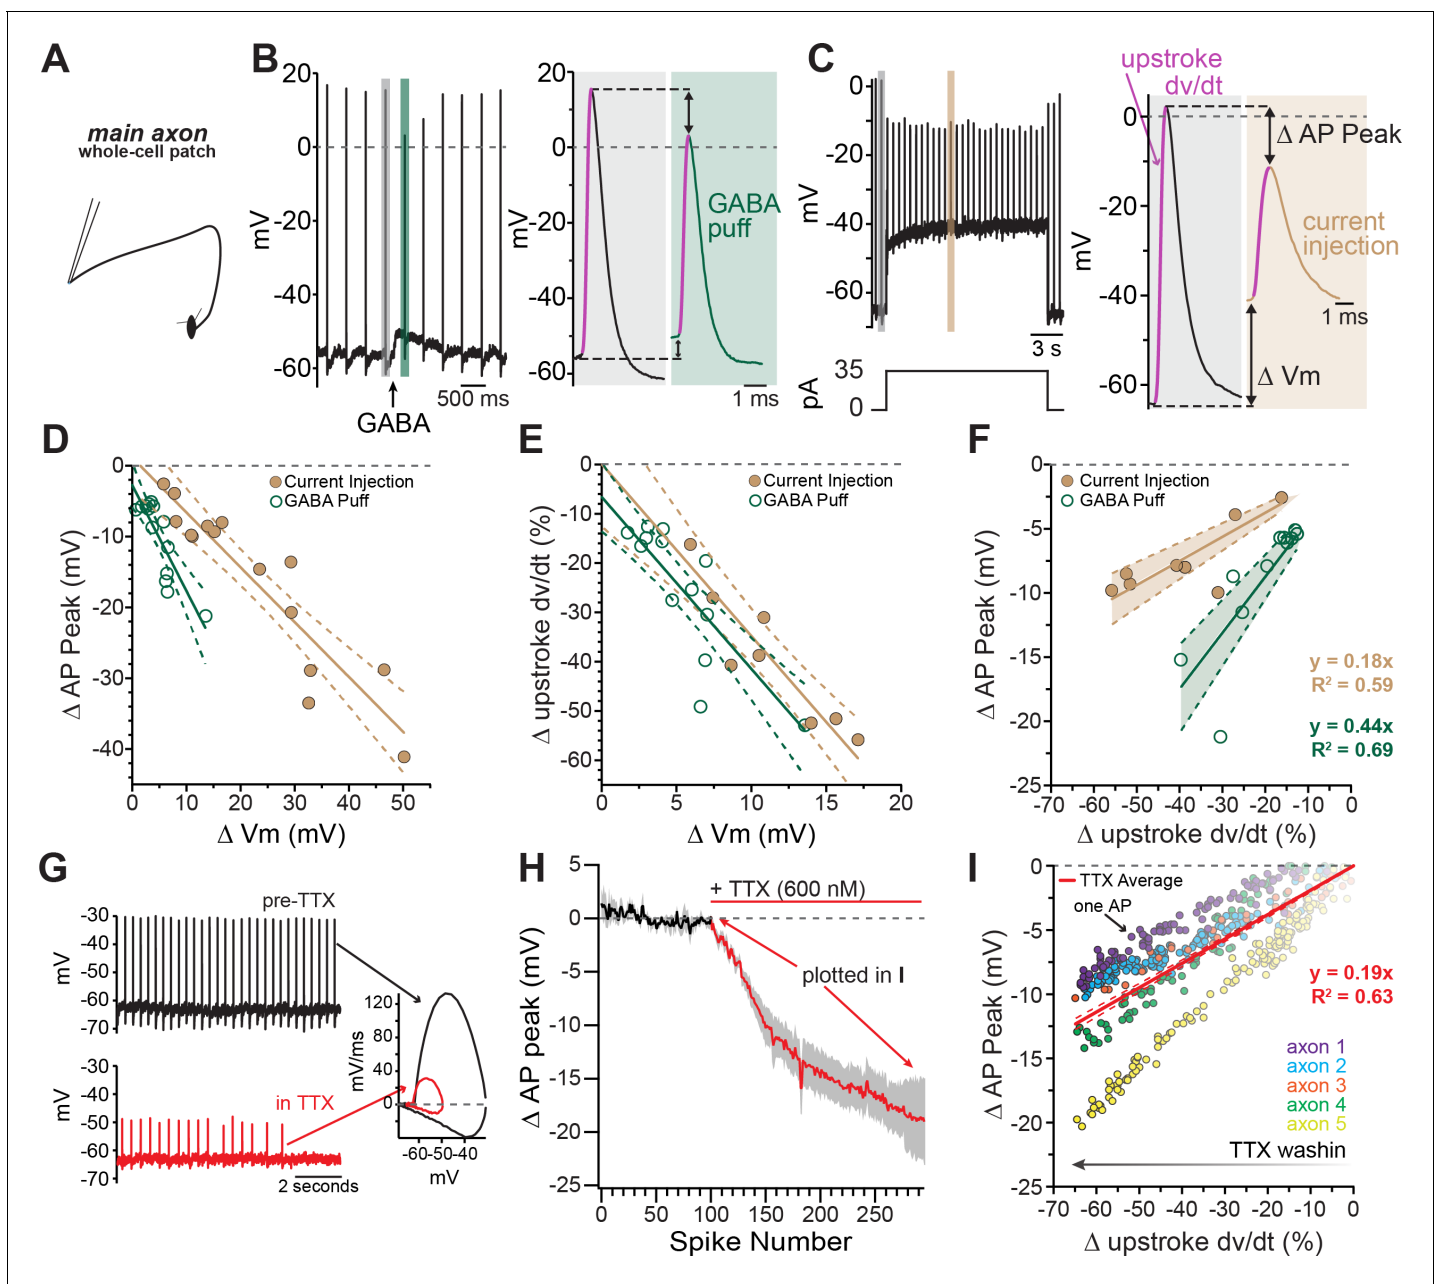

**Figure 4.** Axonal GABA-A receptors inhibit excitability through a combination of sodium channel inactivation and shunting. (A) Schematic of the experimental setup for this figure. Whole-cell recordings were made from the main, connected, axons of dopamine neurons. (B) Example axonal recording showing the effect of a brief GABA pressure ejection. Control (gray) and GABA (green) traces magnified. *B, right:* Control action potential in black and GABA-affected action potential in green. (C) Similar experiment to B, except demonstrating the effect current injection on spike properties as opposed to GABA application. Purple line on AP upstroke denotes area of measurement for rate of rise, arrows denoting measurement of change in AP peak and change in membrane potential. (D) Effect of the amount of baseline depolarization on the decrease in peak AP amplitude, compared between GABA (green;  $n = 14$ ) and current injection (tan;  $n = 15$ ) ( $*p=0.047$ ). (E) Effect of the amount of baseline depolarization on the normalized decrease in rate of AP upstroke, compared between GABA (green;  $n = 11$ ) and current injection (tan;  $n = 10$ ) ( $ns p=0.564$ ). (F) A plot showing the relationship between decrease in rate of AP rise and decrease in AP peak, for injection of current (brown;  $n = 8$ ) and a brief pressure ejection of GABA (green;  $n = 11$ ). (G) Example axonal recording showing spontaneously firing action potentials before the application of TTX (top, black) and after TTX bath perfusion, just before the action potentials cease (bottom, red), inset: Example phase plots for axonal action potentials before (black) and after (red) TTX perfusion. (H) Averaged data showing the effect of TTX on action potential peak amplitude (graphs were aligned to the beginning of TTX effect,  $n = 5$ ). The decrease in peak amplitude is plotted in I. (I) Data from five individual axons showing the effect of TTX wash-in on the change in rate of action potential rise, and the change in the peak of the action potential. Each dot in data from an individual action potential, normalized to just before the perfusion of TTX. In red is the average effect.

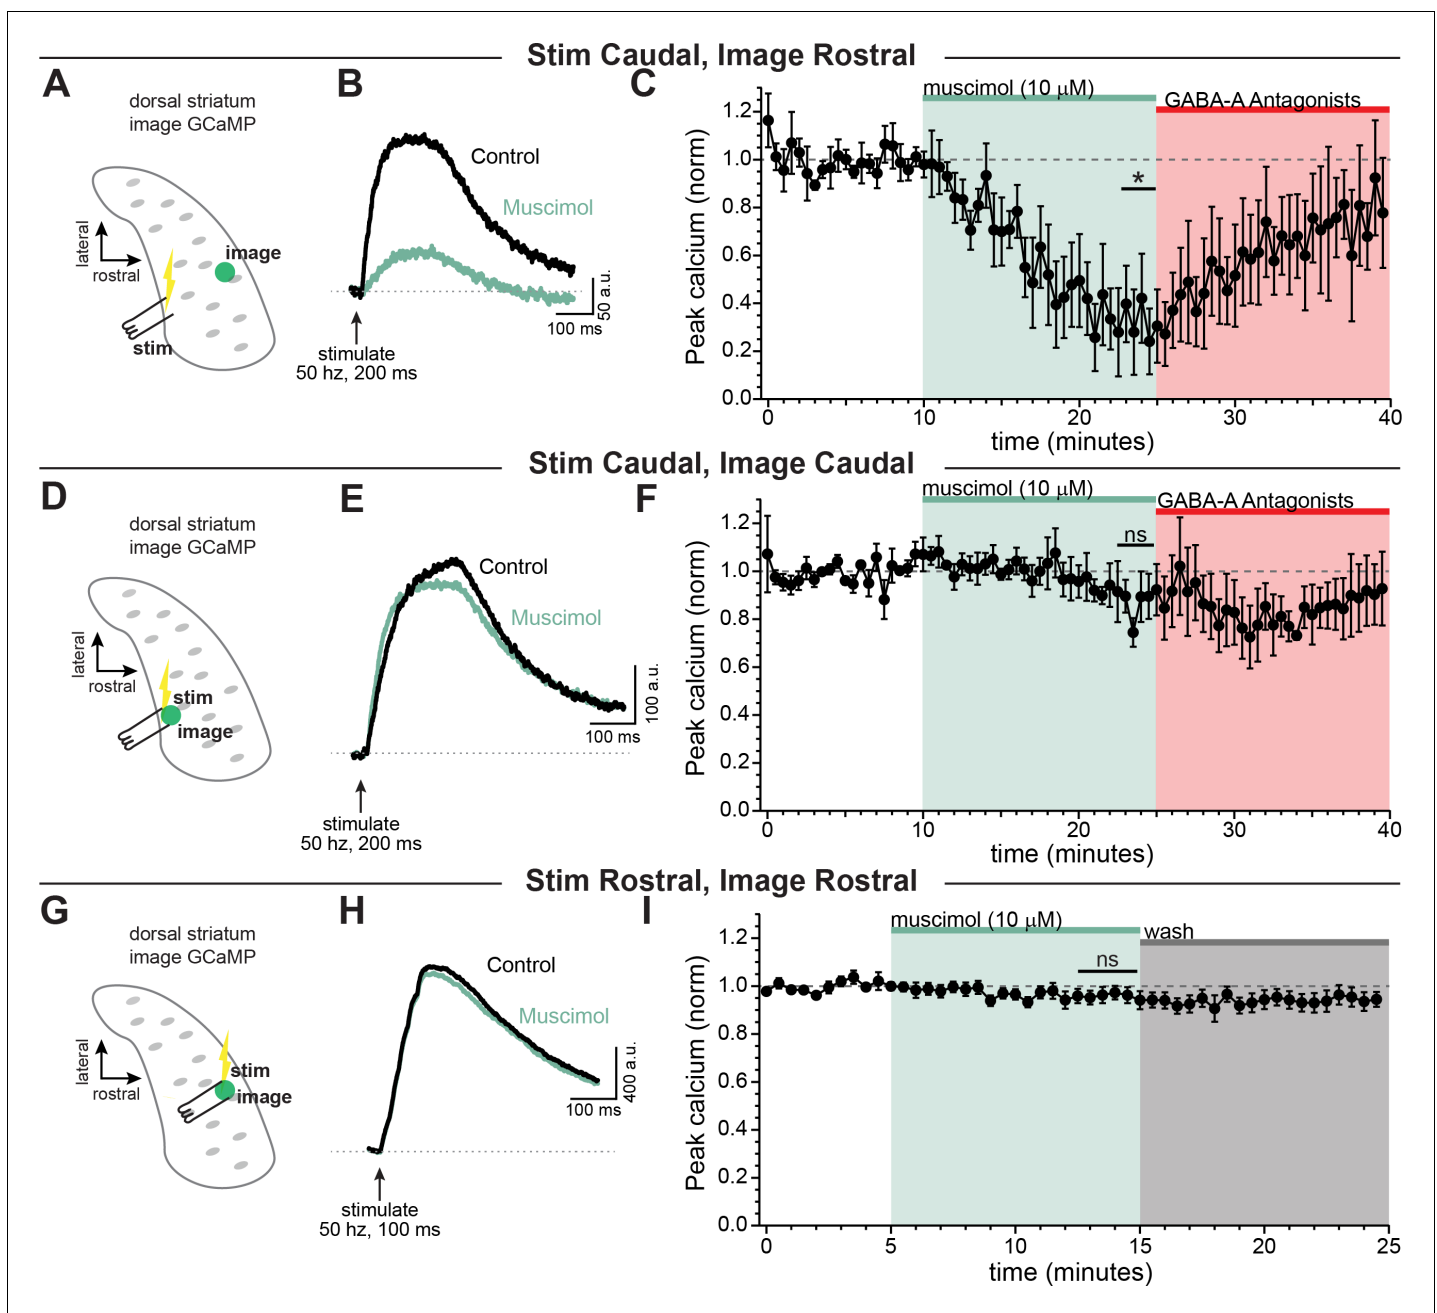

**Figure 5.** GABA-A receptor-mediated inhibition of axonal calcium signals increases with propagation distance. Stimulation-evoked calcium signals in dopamine neuron axons imaged either at the site of stimulation, or distal to the site of stimulation. (A) Experimental setup diagram. (B) Stimulation-evoked GCaMP6f signals in control (*black*) and in response to muscimol bath application (*green*). (C) Time course showing a significant effect of bath applied muscimol for GCaMP6f signals imaged in the rostral striatum, stimulated caudally ( $-690 \pm 73.1 \mu\text{m}$  between stimulation and imaging,  $n = 5$ ;  $*p=0.034$ ). (D) Experimental setup diagram. (E) Stimulation-evoked GCaMP6f signals in control (*black*) and in response to muscimol bath application (*green*). (F) Time course showing no significant effect of bath applied muscimol for GCaMP6f signals imaged near to the site of stimulation in the caudal striatum ( $-100 \pm 29.2 \mu\text{m}$  between stimulation and recording,  $n = 5$ ,  $p=0.95$ ). (G) Experimental setup diagram. (H) Stimulation-evoked GCaMP6f signals in control (*black*) and in response to muscimol bath application (*green*). (I) Time course showing no significant effect of bath applied muscimol for GCaMP6f signals imaged near to the site of stimulation in the rostral striatum ( $<100 \mu\text{m}$  between stimulation and recording,  $n = 8$ ,  $p=0.61$ ). In these experiments, Hexamethonium Chloride ( $200 \mu\text{M}$ ; **Figure 6A–F**) or Dh $\beta$ E ( $1 \mu\text{M}$ ; **Figure 6G–I**), sulpride ( $1 \mu\text{M}$ ), atropine ( $30 \text{ nM}$ ), and CGP 55845 ( $200 \text{ nM}$ ) were used to block nAChRs, D2Rs, mAChRs, and GABA-BRs respectively.

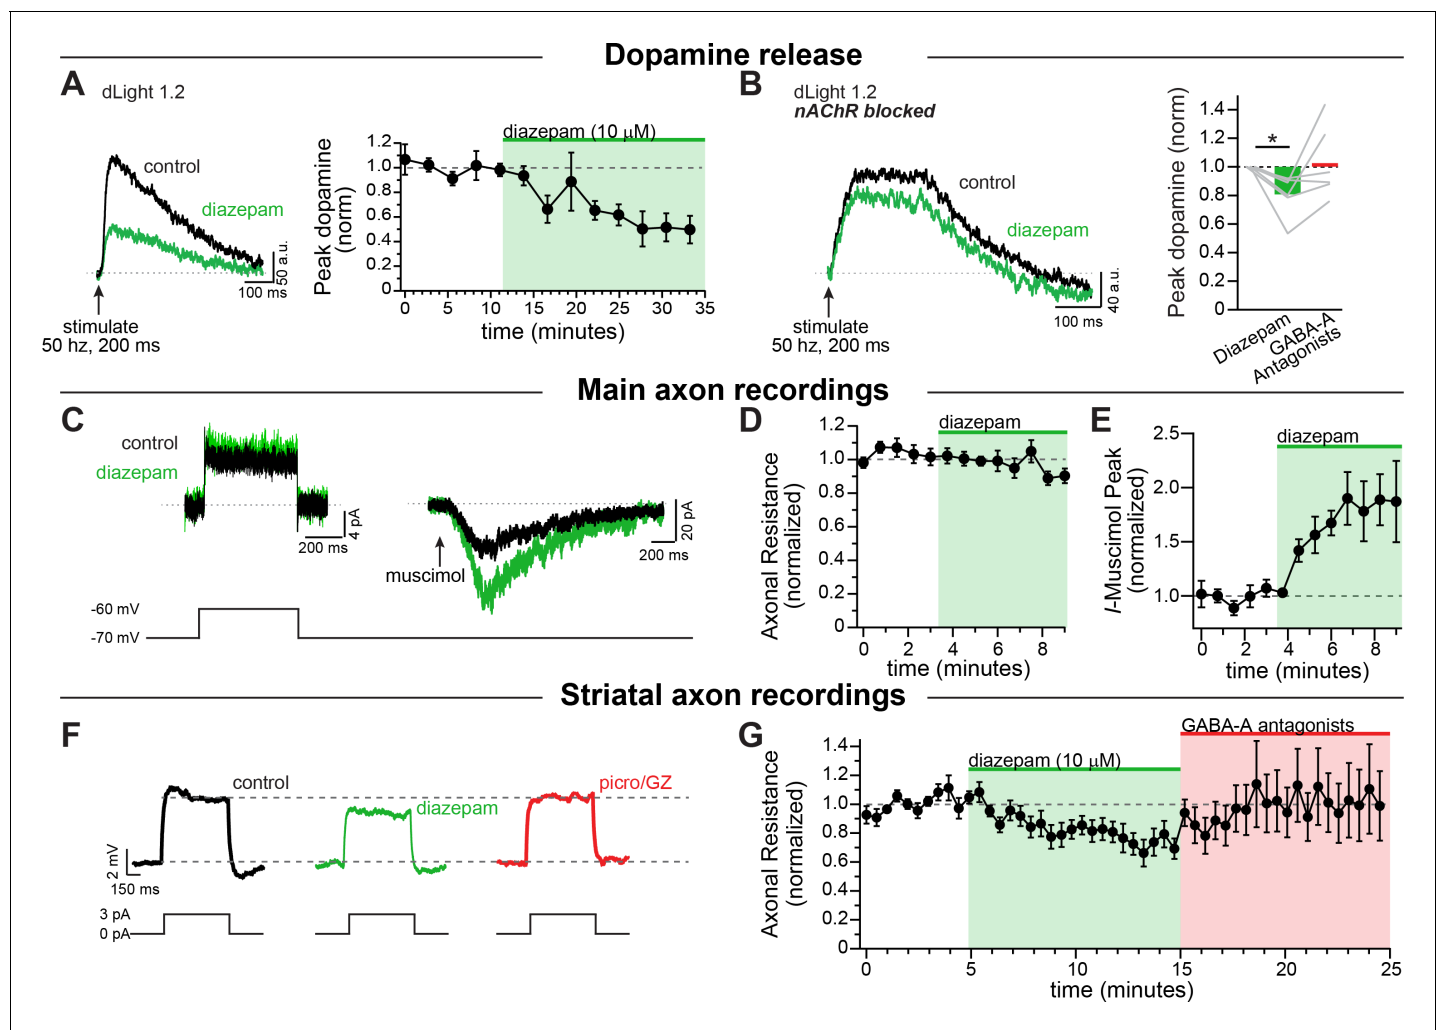

**Figure 6.** Diazepam inhibits striatal dopamine release through direct effects on axonal GABA-A receptors. (A) Example traces of imaged dopamine release from control (black) and diazepam bath perfusion (green) conditions. *Right*: time course showing the effect of diazepam bath perfusion on peak dopamine release ( $n = 5$ ). (B) Example traces of imaged dopamine release from control (black) and diazepam bath perfusion (green) conditions with nAChRs blocked. *Right*: Group effect of diazepam on peak dopamine release ( $n = 6$ ;  $*p=0.044$ ). GABA-A Antagonists picrotoxin (100  $\mu$ M) and gabazine (10  $\mu$ M) were perfused at the end of each experiment. (C) Example step depolarization (*left*) and muscimol pressure ejection (*right*) recorded in the main axon in control (black) and diazepam bath application (green). Step depolarization and muscimol puff were performed within the same cell. (D) Time course showing the effect of diazepam bath application on the normalized input resistance of the main axon in the medial forebrain bundle ( $n = 5$ ). (E) Time course showing the effect of diazepam bath application on the normalized muscimol-evoked peak current ( $n = 6$ ). (F) Example current injections to test axonal input resistance in control (black) diazepam (green) and GABA-A antagonists picrotoxin and gabazine (red) conditions. (G) Time course of diazepam bath perfusion followed by GABA-A antagonist bath perfusion on the normalized axonal input resistance. Hexamethonium chloride (200  $\mu$ M), sulpiride (1  $\mu$ M), atropine (30 nM), and CGP 55845 (200 nM) were used to block nAChRs, D2Rs, mAChRs, and GABA-BRs respectively.



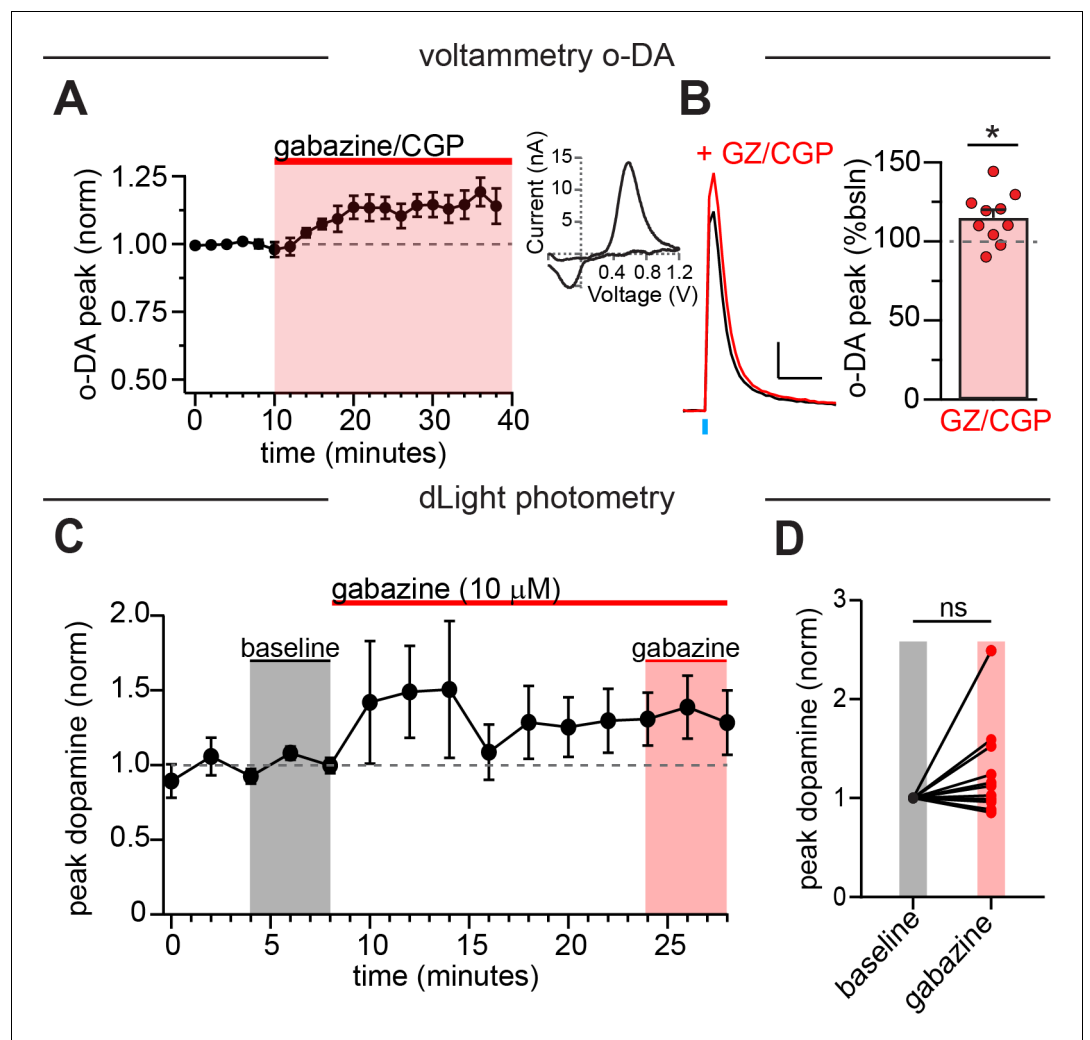

**Figure 6—figure supplement 1.** Inhibition of GABA-A alone does not significantly enhance dopamine release. (A) GABA-A and GABA-B antagonists significantly increased optically-evoked dopamine release measured with voltammetry. *Inset:* example CV plot for dopamine release. (B) *Left:* Example dopamine transient in control (black) and in GZ/CGP (red). *Right:* Plot of the average increase in peak optically-evoked dopamine release (each point is one slice;  $n=10$ ,  $p=0.015$ ). (C) Bath perfusion of the GABA-A antagonist gabazine ( $10\ \mu\text{M}$ ) did not significantly alter dopamine release as measured with dLight. (D) Comparison between the average baseline dopamine release (normalized) to the average final three events in gabazine. There was no significant difference between the baseline and gabazine ( $\bar{x}=126 \pm 14.3\%$  of baseline) conditions (two-tailed paired t-test,  $t(10)=1.8$ ;  $p=0.10$ ;  $n=11$ ). Experiment was performed in the presence of CGP ( $200\ \text{nM}$ ), sulpiride ( $1\ \mu\text{M}$ ), atropine ( $30\ \text{nM}$ ), and  $\text{DH}\beta\text{E}$  ( $1\ \mu\text{M}$ ).
